# Supplementary material for: Dependence of the SBU length on the size of metal ions in alkaline earth MOFs derived from a flexible C3-symmetric tricarboxylic acid
Source: Royal Society of Chemistry journal article supplement (doi:10.1039/c6ce01821a), 2016-01-01
Supplement: c6ce01821a1.pdf [file c6ce01821a1.pdf]

## Electronic Supporting Information

Dependence of SBU length on the size of metal ion in alkaline earth MOFs derived from a flexible  $C_3$ -symmetric tricarboxylic acid

Pratap Vishnoi, D. Kaleeswaran, Alok Ch. Kalita and Ramaswamy Murugavel\*

Department of Chemistry,  
Indian Institute of Technology Bombay, Mumbai, India 400 076.  
Email: [rmv@chem.iitb.ac.in](mailto:rmv@chem.iitb.ac.in); Tel. +91 22 2576 7163

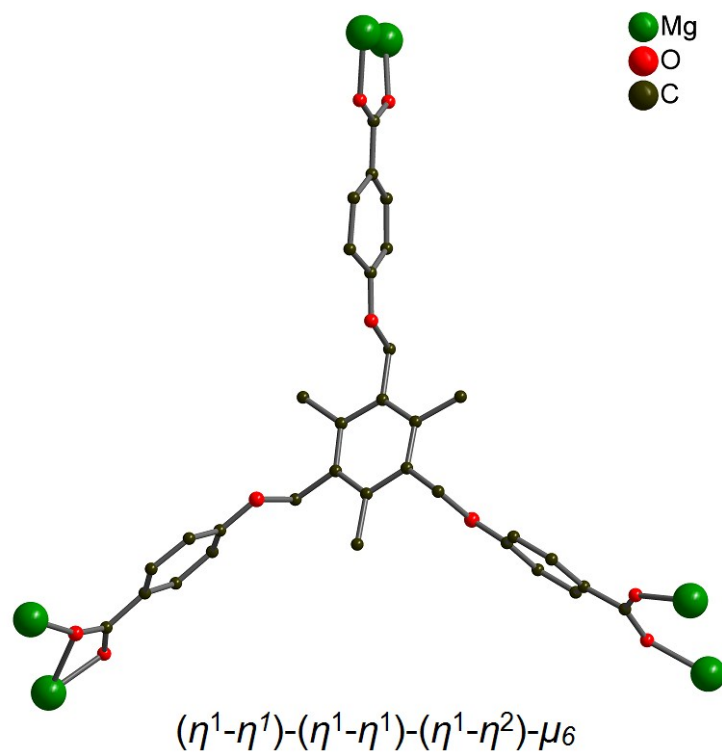

**Fig. S1.** Various coordination modes of the COO<sup>-</sup> moieties in Mg-TCMTB.

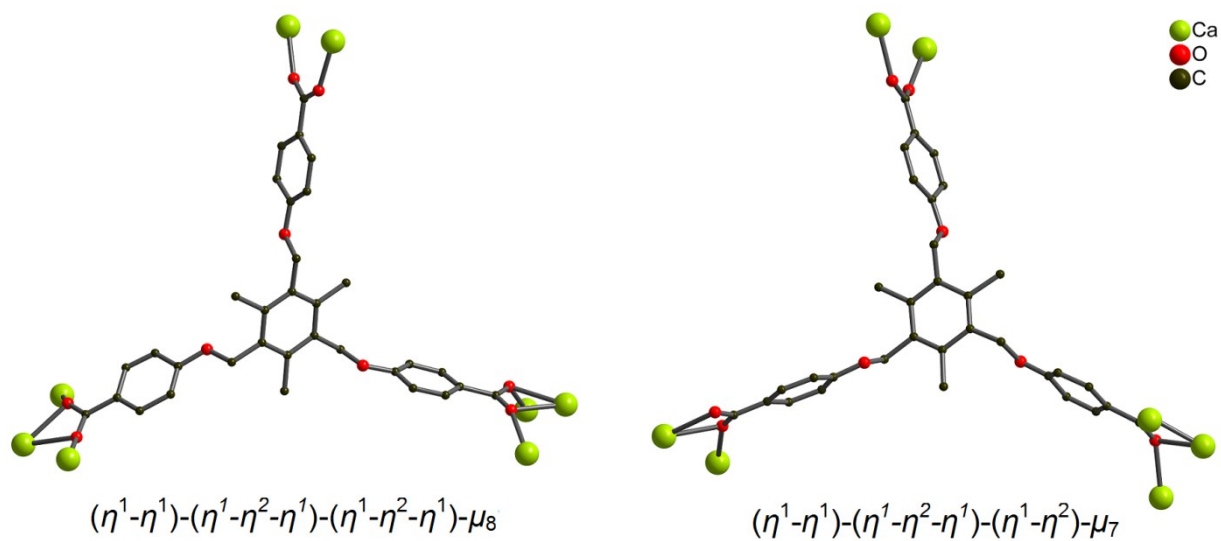

**Fig. S2.** Various coordination modes of the COO<sup>-</sup> moieties in Ca-TCMTB.

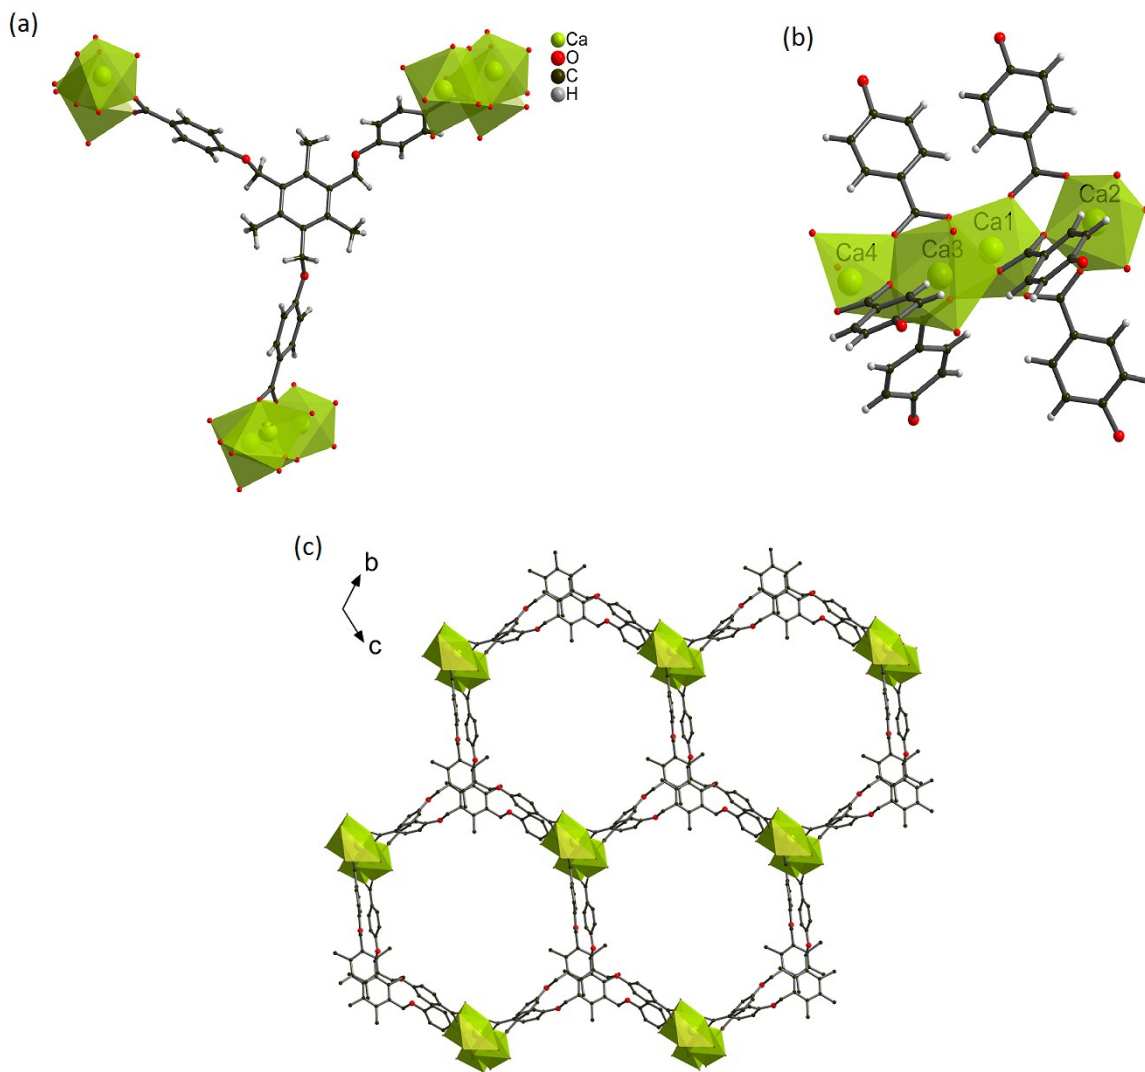

**Fig S3.** Crystal structure of Ca-TCMTB. (a) connectivity of TCMTB<sup>3-</sup> with Ca<sup>2+</sup> ions; (b) polyhedral representation of the coordination environment of Ca<sup>2+</sup> ions; (c) a view of the framework down to *a*-axis. (H-atoms and solvent molecules are omitted for clarity).

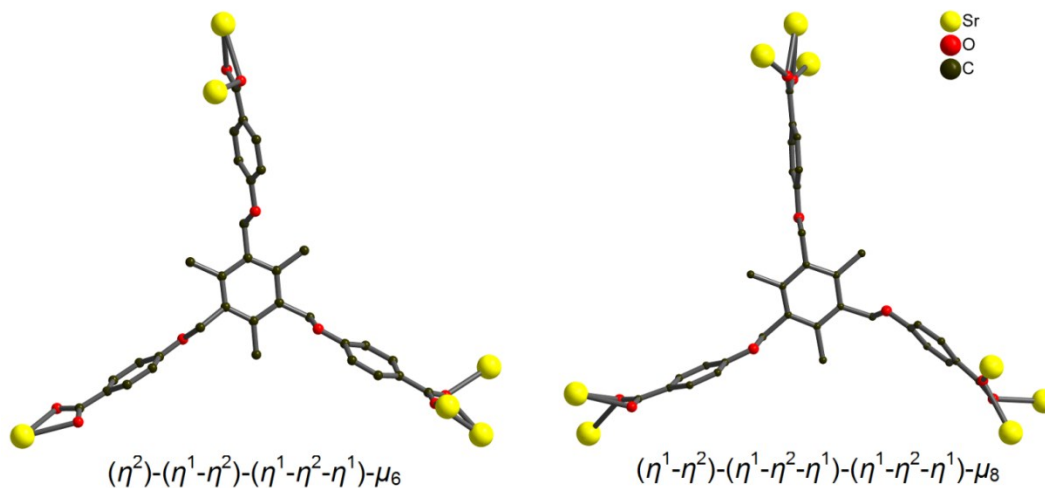

**Fig. S4.** Various coordination modes of the COO<sup>-</sup> moieties in Sr-TCMTB.

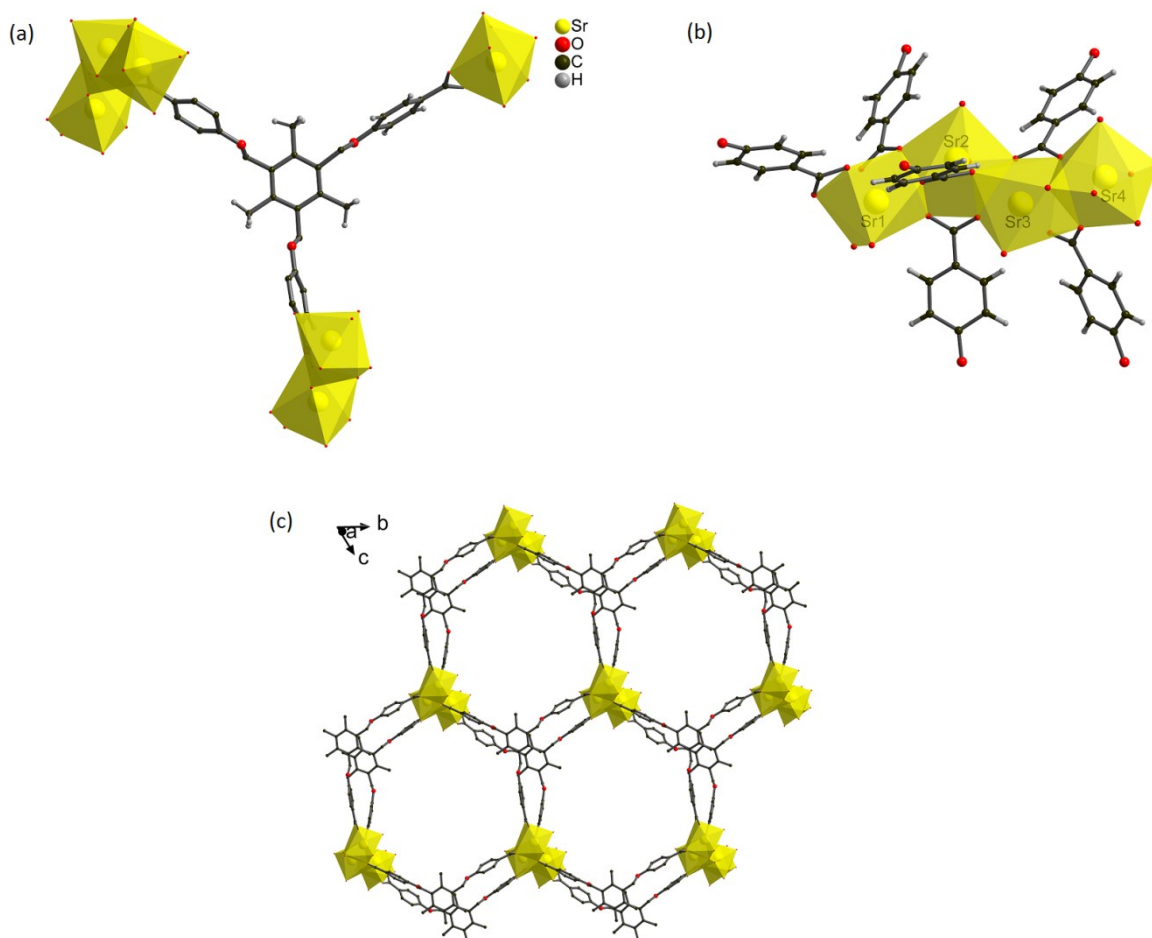

**Fig S5.** Crystal structure of Sr-TCMTB. (a) connectivity of TCMTB<sup>3-</sup>; (b) coordination environment of Sr<sup>2+</sup> ions; (c) 2D sheet viewed along *a*-axis (slightly off) showing hexagonal channels.

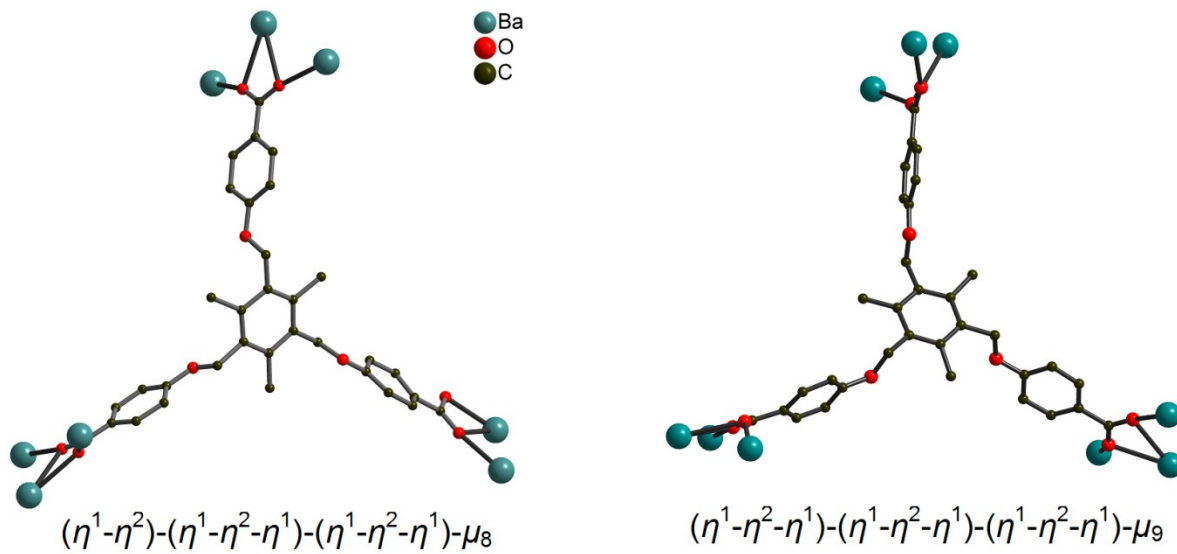

**Fig. S6.** Various coordination modes of the COO<sup>-</sup> moieties in Ba-TCMTB.

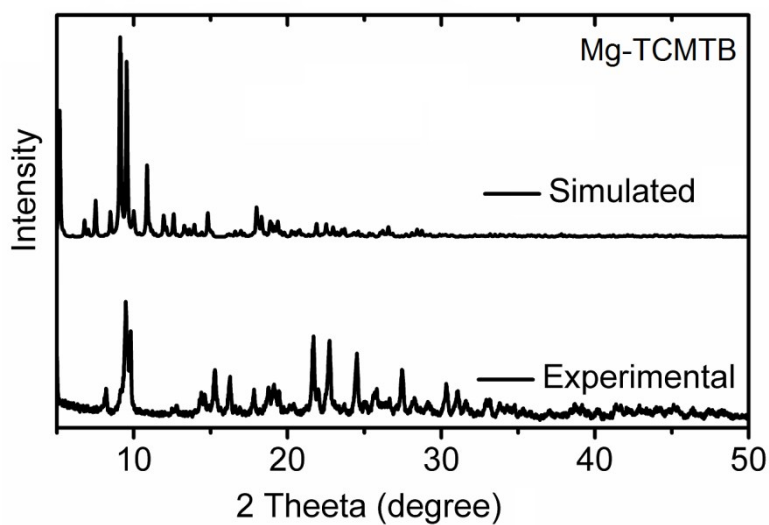

**Fig S7.** Experimental and simulated PXRD patterns of as-prepared Mg-TCMTB.

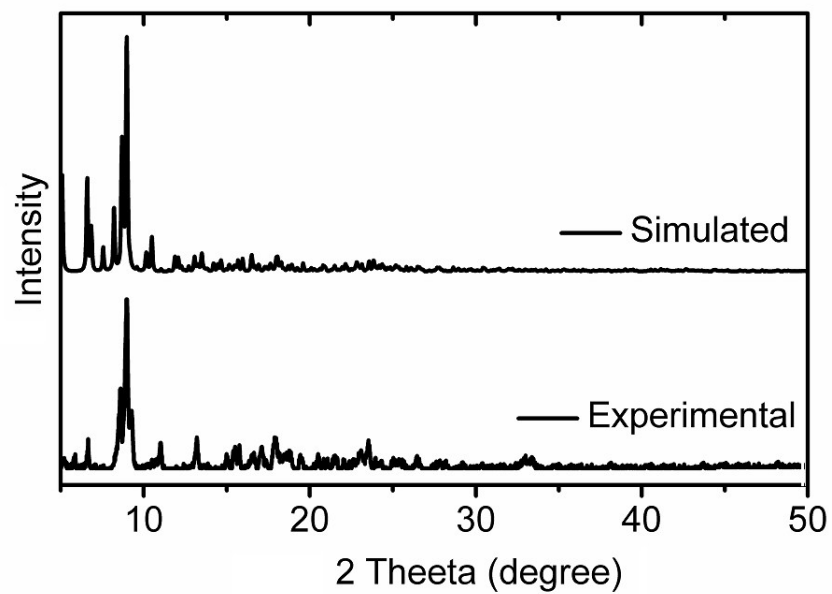

**Fig S8.** Experimental and simulated PXR D patterns of as-prepared Ca-TCMTB.

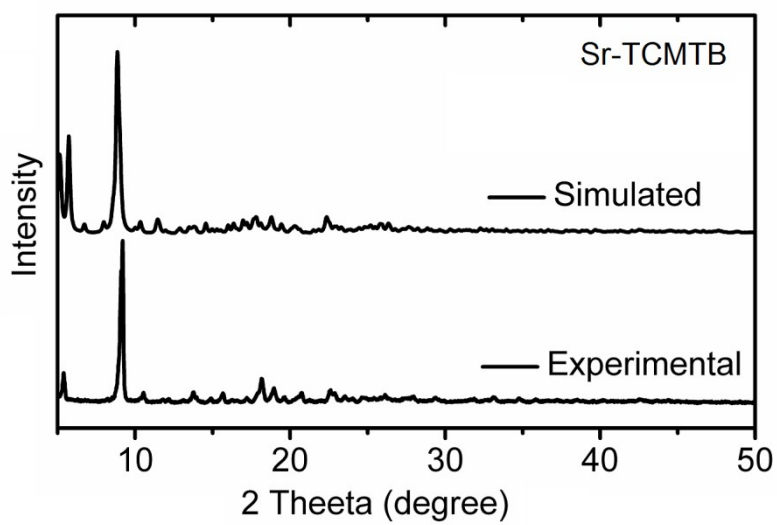

**Fig S9.** Experimental and simulated PXR D patterns of as-prepared Sr-TCMTB.

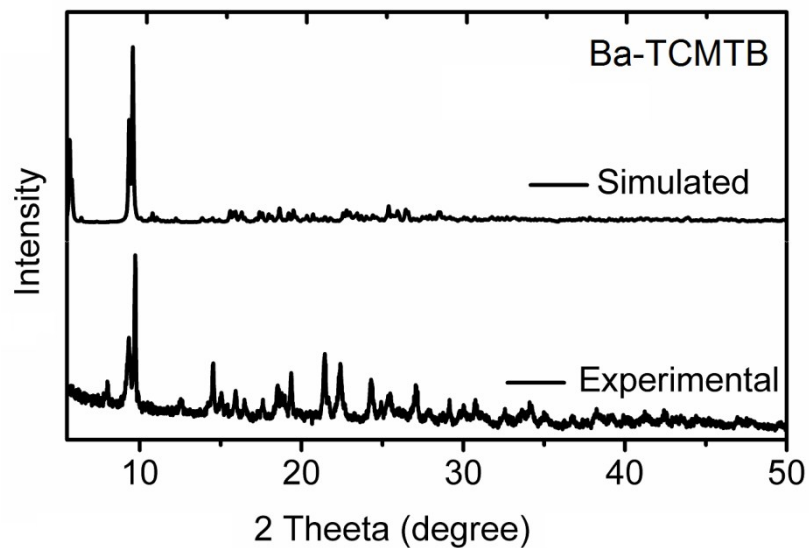

**Fig S10.** Experimental and simulated PXR D patterns of as-prepared Ba-TCMTB.

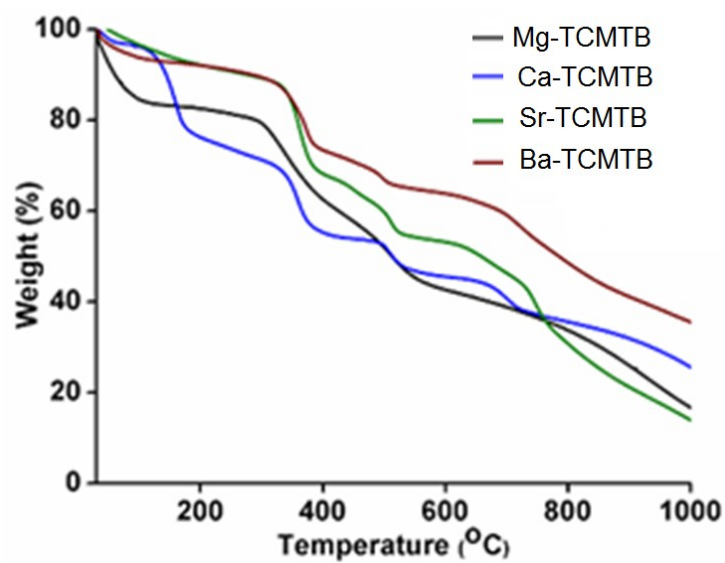

**Fig S11.** TGA profiles of the MOFs under N<sub>2</sub> atm at heating rate of 10 °C/minute.

**FT-IR spectroscopic studies.** FT-IR spectra have been recorded for ligand and the complexes which show the metal carboxylate bond formation (Figure S6). Disappearance of carbonyl group stretching frequency ( $1682\text{ cm}^{-1}$ ) and appearance of two new peaks at lower wavenumbers ( $1610\text{-}1385\text{ cm}^{-1}$ ) indicate the formation of metal-carboxylate bonds that corresponds to the anti-symmetric and symmetric C=O stretching of the carboxylate group ( $-\text{COO}^-$ ).

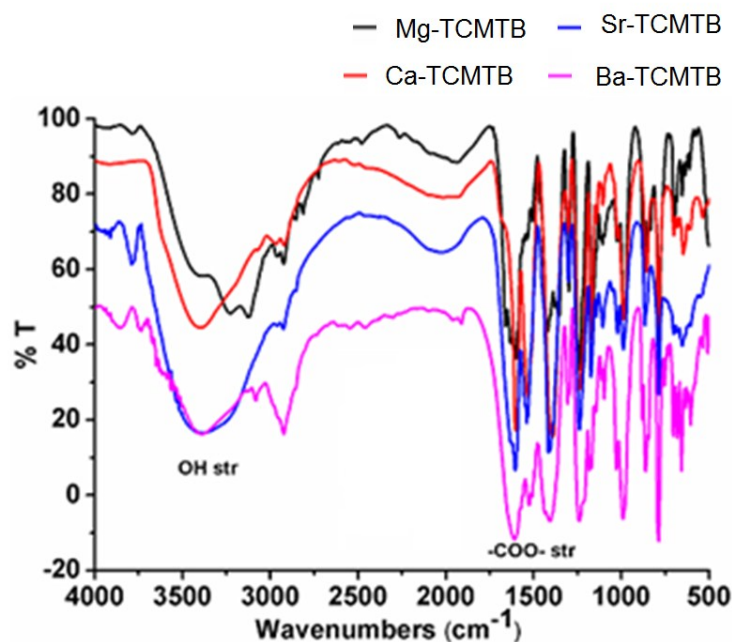

**Fig S12.** FT-IR spectra of the MOFs.

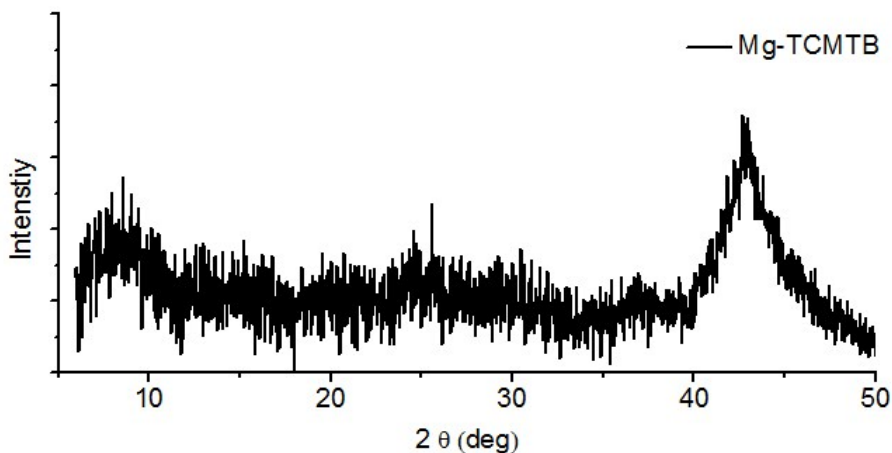

**Fig S13.** PXRD pattern of TGA analyzed Mg-TCMTB powder.



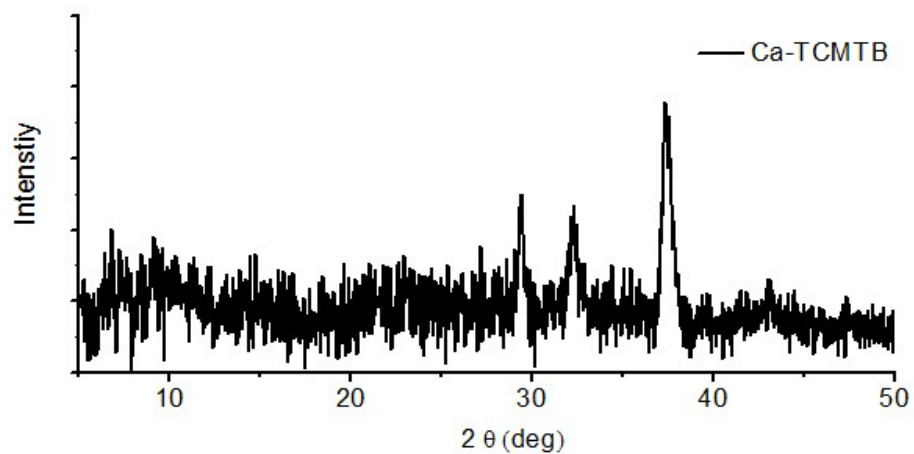

**Fig S14.** PXRD pattern of TGA analyzed Ca-TCMTB powder.

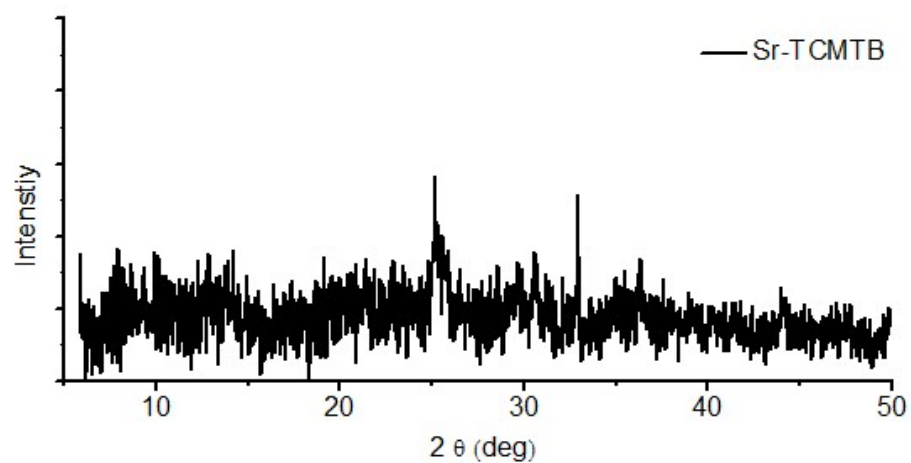

**Fig S15.** PXRD pattern of TGA analyzed Sr-TCMTB powder.

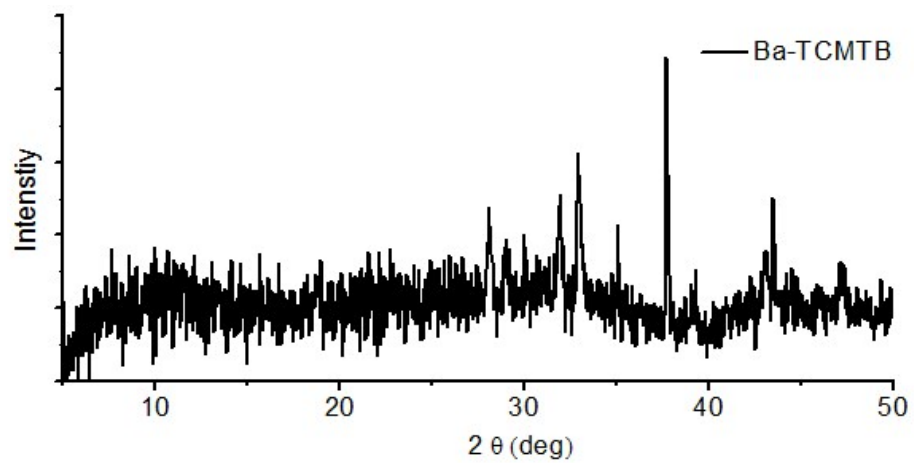

**Fig S16.** PXRD pattern of TGA analyzed Ba-TCMTB powder.

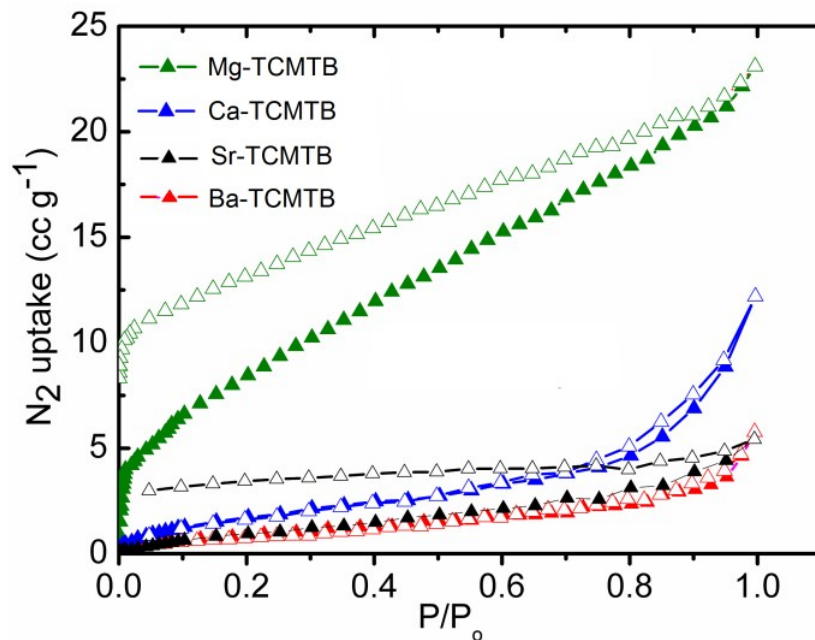

**Fig S17.** N<sub>2</sub> adsorption-desorption isotherms of the alkaline-earth metal MOFs at 77 K.

**Absorption properties.** The absorption spectra were recorded with a Varian Cary Bio 100 UV-vis spectrophotometer. The fluorescence spectral studies were performed on a Varian Cary Eclipse fluorescence spectrophotometer equipped with Xenon flash lamp light source and a 1 cm path length quartz cuvette keeping excitation slit width at 10 nm and emission slit width at 20 nm". 1 mg of each sample was dispersed in DMSO by sonication for 20 minutes.

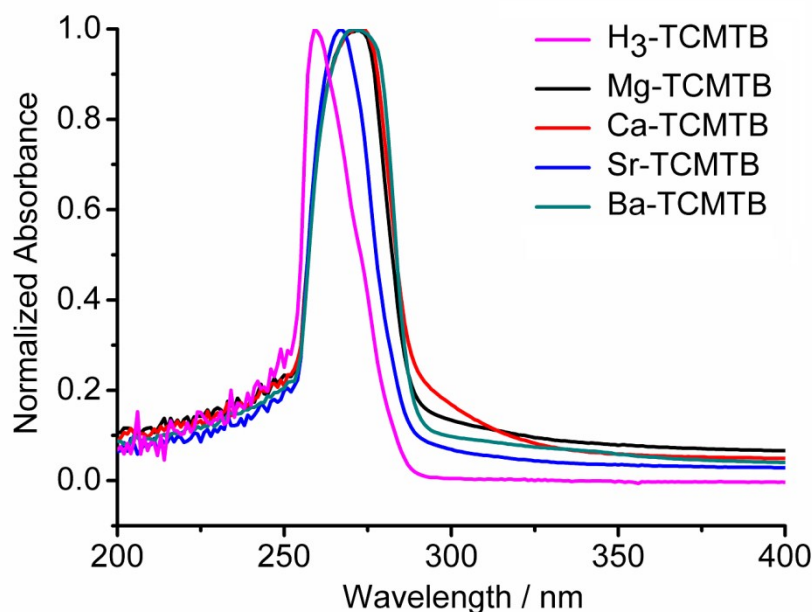

**Fig S18.** Absorption spectra of free ligand (Conc. =  $1 \times 10^{-5}$  M) and the MOFs in DMSO solution and suspension, respectively.

**Table S1.** Selected bond lengths (Å) and angles (°) for Mg-TCMTB.

| <b>Mg-O bond lengths</b>  |           |                  |           |
|---------------------------|-----------|------------------|-----------|
| Mg(1)-O(2)                | 2.031(4)  | Mg(3)-O(2)       | 2.028(4)  |
| Mg(1)-O(6)                | 2.048(3)  | Mg(3)-O(1)       | 2.039(3)  |
| Mg(1)-O(8)                | 2.092(3)  | Mg(3)-O(2)       | 2.068(3)  |
| Mg(2)-O(5)                | 1.994(3)  | Mg(4)-O(1)       | 1.931(5)  |
| Mg(2)-O(3)                | 2.030(4)  | Mg(4)-O(1)       | 1.984(4)  |
| Mg(2)-O(9)                | 2.169(4)  | Mg(4)-O(2)       | 2.025(4)  |
| Mg(2)-O(8)                | 2.196(3)  | Mg(4)-O(2)       | 2.218(3)  |
| <b>Mg···Mg distances</b>  |           |                  |           |
| Mg(1)-Mg(2)               | 3.531(2)  | Mg(3)-Mg(4)      | 3.543(2)  |
| <b>O-Mg-O bond angles</b> |           |                  |           |
| O(2)-Mg(1)-O(6)           | 95.04(1)  | O(14)-Mg(4)-O(1) | 112.87(2) |
| O(2)-Mg(1)-O(8)           | 92.08(1)  | O(14)-Mg(4)-O(2) | 129.4(2)  |
| O(6)1-Mg(1)-O(8)          | 91.58(1)  | O(12)-Mg(4)-O(2) | 110.98(2) |
| O(23)-Mg(1)-O(8)          | 88.21(1)  | O(14)-Mg(4)-O(2) | 94.37(2)  |
| O(5)-Mg(2)-O(3)           | 97.45(2)  | O(14)-Mg(4)-O(2) | 159.59(1) |
| O(5)-Mg(2)-O(9)           | 154.41(1) | O(12)-Mg(4)-O(2) | 91.15(1)  |
| O(3)-Mg(2)-O(9)           | 93.54(1)  | O(17)-Mg(4)-O(2) | 60.65(1)  |
| O(5)-Mg(2)-O(8)           | 95.53(1)  | O(15)-Mg(3)-O(1) | 92.33(2)  |
| O(3)-Mg(2)-O(8)           | 95.15(1)  | O(15)-Mg(3)-O(2) | 89.89(1)  |
| O(9)-Mg(2)-O(8)           | 60.40(1)  | O(11)-Mg(3)-O(2) | 88.52(1)  |

**Table S2.** Selected bond lengths (Å) and angles (°) for Ca-TCMTB.

| <b>Ca-O bond lengths</b> |          |             |          |             |          |
|--------------------------|----------|-------------|----------|-------------|----------|
| Ca(1)-O(1)               | 2.297(6) | Ca(2)-O(1)  | 2.307(7) | Ca(3)-O(2)  | 2.379(6) |
| Ca(1)-O(3)               | 2.320(6) | Ca(2)-O(1)  | 2.371(6) | Ca(3)-O(2)  | 2.462(6) |
| Ca(1)-O(8)               | 2.394(6) | Ca(2)-O(2)  | 2.385(8) | Ca(3)-O(9)  | 2.468(6) |
| Ca(1)-O(2)               | 2.396(7) | Ca(2)-O(2)  | 2.413(8) | Ca(3)-O(2)  | 2.633(6) |
| Ca(1)-O(2)               | 2.452(5) | Ca(2)-O(2)  | 2.453(8) | Ca(4)-O(2)  | 2.454(7) |
| Ca(1)-O(2)               | 2.504(6) | Ca(3)-O(6)  | 2.336(6) | Ca(4)-O(2)  | 2.473(1) |
| Ca(1)-O(1)               | 2.675(6) | Ca(3)-O(2)  | 2.362(6) | Ca(4)-O(6)  | 2.521(7) |
| Ca(2)-O(2)               | 2.269(7) | Ca(3)-O(2)  | 2.368(5) | Ca(4)-O(5)  | 2.643(8) |
| <b>Ca···Ca distances</b> |          |             |          |             |          |
| Ca(1)-Ca(3)              | 3.610(4) | Ca(1)-Ca(2) | 4.145(3) | Ca(3)-Ca(1) | 3.610(4) |

Ca(4)-Ca(3) 3.545(3)

**O-Ca-O bond angles**

|                  |          |                   |           |                   |           |
|------------------|----------|-------------------|-----------|-------------------|-----------|
| O(12)-Ca(1)-O(3) | 103.7(2) | O(24)-Ca(1)-O(1)  | 159.5(2)  | O(15)-Ca(3)-O(9)  | 123.76(2) |
| O(12)-Ca(1)-O(8) | 91.7(2)  | O(17)-Ca(1)-O(1)  | 118.75(2) | O(17)-Ca(3)-O(9)  | 87.4(2)   |
| O(3)-Ca(1)-O(8)  | 164.5(2) | O(15)-Ca(1)-O(1)  | 50.74(2)  | O(6)-Ca(3)-O(18)  | 74.4(2)   |
| O(12)-Ca(1)-O(2) | 158.5(2) | O(2)-Ca(2)-O(1)   | 98.0(3)   | O(19)-Ca(3)-O(18) | 156.8(2)  |
| O(3)-Ca(1)-O(2)  | 88.7(2)  | O(2)-Ca(2)-O(1)   | 86.2(2)   | O(15)-Ca(3)-O(18) | 120.0(2)  |
| O(8)-Ca(1)-O(2)  | 76.99(2) | O(11)-Ca(2)-O(1)  | 90.4(2)   | O(20)-Ca(3)-O(18) | 84.5(2)   |
| O(24)-Ca(1)-O(2) | 81.6(2)  | O(9)-Ca(3)-O(8)   | 51.85(2)  | O(17)-Ca(3)-O(18) | 51.54(2)  |
| O(12)-Ca(1)-O(2) | 125.9(2) | O(18)-Ca(3)-O(8)  | 102.1(2)  | O(9)-Ca(3)-O(18)  | 74.3(2)   |
| O(3)-Ca(1)-O(2)  | 95.2(2)  | O(6)-Ca(3)-O(2)   | 159.2(2)  | O(6)-Ca(3)-O(8)   | 122.1(2)  |
| O(8)-Ca(1)-O(2)  | 74.42(2) | O(19)-Ca(3)-O(2)  | 83.1(2)   | O(15)-Ca(3)-O(8)  | 72.01(2)  |
| O(24)-Ca(1)-O(2) | 149.5(2) | O(6)-Ca(3)-O(2)   | 125.8(2)  | O(9)-Ca(4)-O(5)   | 119.0(2)  |
| O(17)-Ca(1)-O(2) | 69.13(2) | O(19)-Ca(3)-O(2)  | 148.1(2)  | O(18)-Ca(4)-O(5)  | 100.2(3)  |
| O(12)-Ca(1)-O(1) | 80.1(2)  | O(15)-Ca(3)-O(17) | 71.2(2)   | O(25)-Ca(4)-O(5)  | 155.6(3)  |
| O(3)-Ca(1)-O(1)  | 86.3(2)  | O(20)-Ca(3)-O(17) | 94.7(2)   | O(6)-Ca(4)-O(5)   | 51.4(2)   |
| O(8)-Ca(1)-O(1)  | 95.42(2) | O(6)-Ca(3)-O(9)   | 72.8(2)   | O(17)-Ca(3)-O(8)  | 72.09(2)  |

**Table S3.** Selected bond lengths (Å) and angles (°) for Sr-TCMTB.

**Ca-O bond lengths**

|             |          |            |          |            |          |
|-------------|----------|------------|----------|------------|----------|
| Sr(1)-O(3)  | 2.548(1) | Sr(2)-O(8) | 2.598(6) | Sr(3)-O(1) | 2.748(8) |
| Sr(1)-O(9)  | 2.565(6) | Sr(2)-O(1) | 2.510(6) | Sr(3)-O(2) | 2.570(7) |
| Sr(1)-O(17) | 2.599(7) | Sr(2)-O(2) | 2.650(6) | Sr(3)-O(1) | 2.645(6) |
| Sr(1)-O(5)  | 2.645(6) | Sr(2)-O(9) | 2.704(7) | Sr(3)-O(1) | 2.673(6) |
| Sr(1)-O(6)  | 2.711(7) | Sr(2)-O(2) | 2.714(6) | Sr(4)-O(1) | 2.549(7) |
| Sr(1)-O(2)  | 2.717(7) | Sr(3)-O(2) | 2.531(6) | Sr(4)-O(1) | 2.562(8) |
| Sr(2)-O(5)  | 2.513(6) | Sr(3)-O(8) | 2.544(6) |            |          |

**Sr···Sr distances**

|             |           |             |           |             |          |
|-------------|-----------|-------------|-----------|-------------|----------|
| Sr(1)-Sr(2) | 3.8999(2) | Sr(2)-Sr(3) | 3.8361(2) | Sr(3)-Sr(4) | 3.859(2) |
|-------------|-----------|-------------|-----------|-------------|----------|

**O-Sr-O bond angles**

|                  |          |                  |           |                  |           |
|------------------|----------|------------------|-----------|------------------|-----------|
| O(3)-Sr(1)-O(9)  | 147.8(2) | O(8)-Sr(2)-O(9)  | 49.98(2)  | O(5)-Sr(1)-O(2)  | 109.9(2)  |
| O(3)-Sr(1)-O(17) | 79.5(2)  | O(17)-Sr(2)-O(9) | 67.25(2)  | O(6)-Sr(1)-O(2)  | 81.4(2)   |
| O(9)-Sr(1)-O(17) | 70.1(2)  | O(11)-Sr(2)-O(2) | 71.95(2)  | O(11)-Sr(2)-O(5) | 166.25(2) |
| O(3)-Sr(1)-O(5)  | 86.8(2)  | O(5)-Sr(2)-O(2)  | 115.57(2) | O(18)-Sr(3)-O(1) | 72.80(2)  |
| O(9)-Sr(1)-O(5)  | 72.94(2) | O(8)-Sr(2)-O(2)  | 68.71(2)  | O(8)-Sr(3)-O(1)  | 70.2(2)   |

|                   |           |                  |          |                  |          |
|-------------------|-----------|------------------|----------|------------------|----------|
| O(17)-Sr(1)-O(5)  | 69.17(2)  | O(17)-Sr(2)-O(2) | 49.16(2) | O(15)-Sr(3)-O(1) | 84.7(2)  |
| O(3)-Sr(1)-O(6)   | 97.3(2)   | O(9)-Sr(2)-O(2)  | 98.2(2)  | O(18)-Sr(3)-O(1) | 98.9(2)  |
| O(9)-Sr(1)-O(6)   | 88.1(2)   | O(18)-Sr(3)-O(8) | 72.5(2)  | O(8)-Sr(3)-O(1)  | 117.7(2) |
| O(11)-Sr(2)-O(8)  | 71.4(2)   | O(18)-Sr(3)-O(2) | 146.7(2) | O(15)-Sr(3)-O(1) | 83.7(2)  |
| O(5)-Sr(2)-O(8)   | 121.6(2)  | O(8)-Sr(3)-O(2)  | 76.9(2)  | O(11)-Sr(3)-O(1) | 49.32(2) |
| O(11)-Sr(2)-O(17) | 120.02(2) | O(17)-Sr(1)-O(6) | 118.1(2) | O(18)-Sr(3)-O(1) | 162.2(2) |
| O(5)-Sr(2)-O(17)  | 70.24(2)  | O(5)-Sr(1)-O(6)  | 49.0(2)  | O(8)-Sr(3)-O(1)  | 125.2(2) |
| O(8)-Sr(2)-O(17)  | 77.17(2)  | O(3)-Sr(1)-O(2)  | 49.3(2)  | O(15)-Sr(3)-O(1) | 49.5(2)  |
| O(11)-Sr(2)-O(9)  | 118.7(2)  | O(9)-Sr(1)-O(2)  | 161.8(2) | O(11)-Sr(3)-O(1) | 109.7(2) |
| O(5)-Sr(2)-O(9)   | 72.77(2)  | O(17)-Sr(1)-O(2) | 128.1(2) |                  |          |

**Table S4.** Selected bond lengths (Å) and angles (°) for Ba-TCMTB.

| <b>Ba-O bond lengths</b> |           |             |           |             |           |
|--------------------------|-----------|-------------|-----------|-------------|-----------|
| Ba(1)-O(5)               | 2.693(3)  | Ba(4)-O(2)  | 2.676(4)  | Ba(6)-O(2)  | 2.794(3)  |
| Ba(1)-O(34)              | 2.697(3)  | Ba(4)-O(7)  | 2.686(3)  | Ba(6)-O(2)  | 2.928(3)  |
| Ba(1)-O(8)               | 2.792(3)  | Ba(4)-O(1)  | 2.802(3)  | Ba(7)-O(2)  | 2.658(3)  |
| Ba(1)-O(9)               | 2.820(3)  | Ba(4)-O(1)  | 2.881(3)  | Ba(7)-O(3)  | 2.748(3)  |
| Ba(1)-O(36)              | 2.849(3)  | Ba(5)-O(3)  | 2.664(3)  | Ba(7)-O(2)  | 2.858(3)  |
| Ba(1)-O(35)              | 2.857(3)  | Ba(5)-O(2)  | 2.693(3)  | Ba(7)-O(2)  | 2.880(3)  |
| Ba(2)-O(35)              | 2.734(3)  | Ba(5)-O(1)  | 2.822(3)  | Ba(8)-O(2)  | 2.719(3)  |
| Ba(2)-O(6)               | 2.743(3)  | Ba(5)-O(2)  | 2.827(3)  | Ba(8)-O(3)  | 2.735(3)  |
| Ba(2)-O(9)               | 2.750(3)  | Ba(5)-O(2)  | 2.863(4)  | Ba(8)-O(3)  | 2.776(3)  |
| Ba(2)-O(5)               | 2.771(3)  | Ba(5)-O(2)  | 2.865(4)  | Ba(8)-O(3)  | 2.787(3)  |
| Ba(2)-O(4)               | 2.896(3)  | Ba(5)-O(2)  | 2.869(3)  | Ba(9)-O(4)  | 2.755(3)  |
| Ba(3)-O(4)               | 2.666(3)  | Ba(5)-O(3)  | 2.982(3)  | Ba(9)-O(3)  | 2.767(3)  |
| Ba(3)-O(13)              | 2.704(3)  | Ba(6)-O(3)  | 2.680(3)  | Ba(9)-O(3)  | 2.771(3)  |
| Ba(3)-O(7)               | 2.840(3)  | Ba(6)-O(2)  | 2.727(3)  | Ba(9)-O(8)  | 2.785(3)  |
| Ba(3)-O(6)               | 2.855(3)  | Ba(6)-O(2)  | 2.775(3)  | Ba(9)-O(3)  | 2.912(3)  |
| <i>Ba...Ba distances</i> |           |             |           |             |           |
| Ba(2)-Ba(3)              | 4.3217(1) | Ba(3)-Ba(4) | 4.2488(8) | Ba(4)-Ba(5) | 4.1632(1) |
| Ba(6)-Ba(7)              | 4.3627(1) | Ba(9)-Ba(1) | 4.2147(1) |             |           |

*O-Ba-O bond angles*

|                   |           |                  |           |                  |           |
|-------------------|-----------|------------------|-----------|------------------|-----------|
| O(5)-Ba(1)-O(3)   | 169.75(9) | O(36)-Ba(1)-O(3) | 45.75(8)  | O(13)-Ba(3)-O(6) | 100.47(9) |
| O(37)-Ba(1)-O(8)  | 155.81(9) | O(6)-Ba(2)-O(5)  | 111.90(9) | O(7)-Ba(3)-O(6)  | 46.23(8)  |
| O(5)-Ba(1)-O(8)   | 117.82(9) | O(9)-Ba(2)-O(5)  | 71.85(9)  | O(17)-Ba(4)-O(7) | 133.74(1) |
| O(34)-Ba(1)-O(8)  | 72.19(9)  | O(35)-Ba(2)-O(4) | 114.36(9) | O(17)-Ba(4)-O(1) | 76.44(1)  |
| O(5)-Ba(1)-O(9)   | 71.93(9)  | O(6)-Ba(2)-O(4)  | 69.48(9)  | O(7)-Ba(4)-O(2)  | 149.74(1) |
| O(34)-Ba(1)-O(9)  | 117.51(9) | O(9)-Ba(2)-O(4)  | 96.54(9)  | O(17)-Ba(4)-O(1) | 69.15(1)  |
| O(8)-Ba(1)-O(9)   | 46.73(9)  | O(5)-Ba(2)-O(4)  | 45.42(8)  | O(7)-Ba(4)-O(14) | 118.26(8) |
| O(5)-Ba(1)-O(4)   | 114.68(9) | O(35)-Ba(2)-O(6) | 149.19(8) | O(15)-Ba(4)-O(1) | 69.40(9)  |
| O(34)-Ba(1)-O(4)  | 66.02(9)  | O(35)-Ba(2)-O(9) | 67.00(8)  | O(15)-Ba(4)-O(1) | 112.96(9) |
| O(8)-Ba(1)-O(4)   | 66.72(8)  | O(6)-Ba(2)-O(9)  | 143.76(8) | O(14)-Ba(4)-O(1) | 45.83(8)  |
| O(9)-Ba(1)-O(4)   | 77.52(8)  | O(35)-Ba(2)-O(5) | 69.71(9)  | O(26)-Ba(5)-O(2) | 96.22(1)  |
| O(5)-Ba(1)-O(3)   | 68.99(9)  | O(4)-Ba(3)-O(1)  | 171.46(9) | O(26)-Ba(5)-O(1) | 80.93(9)  |
| O(34)-Ba(1)-O(3)  | 110.51(9) | O(4)-Ba(3)-O(7)  | 98.53(9)  | O(23)-Ba(5)-O(1) | 174.31(9) |
| O(8)-Ba(1)-O(3)   | 89.73(9)  | O(13)-Ba(3)-O(7) | 73.86(8)  | O(26)-Ba(5)-O(1) | 113.51(1) |
| O(9)-Ba(1)-O(3)   | 64.43(8)  | O(4)-Ba(3)-O(6)  | 71.15(9)  | O(23)-Ba(5)-O(1) | 117.52(9) |
| O(14)-Ba(5)-O(1)  | 68.17(9)  | O(14)-Ba(5)-O(3) | 113.37(8) | O(31)-Ba(7)-O(2) | 103.68(9) |
| O(26)-Ba(5)-O(2)  | 160.32(1) | O(15)-Ba(5)-O(3) | 95.45(9)  | O(22)-Ba(7)-O(2) | 100.49(9) |
| O(23)-Ba(5)-O(18) | 70.24(1)  | O(18)-Ba(5)-O(3) | 132.33(1) | O(31)-Ba(7)-O(2) | 66.51(9)  |
| O(14)-Ba(5)-O(18) | 111.19(9) | O(17)-Ba(5)-O(3) | 167.28(1) | O(25)-Ba(7)-O(2) | 45.54(8)  |
| O(15)-Ba(5)-O(18) | 85.83(1)  | O(16)-Ba(5)-O(3) | 64.68(8)  | O(24)-Ba(8)-O(3) | 92.72(9)  |
| O(26)-Ba(5)-O(17) | 142.04(1) | O(17)-Ba(4)-O(1) | 92.65(1)  | O(33)-Ba(8)-O(3) | 70.83(9)  |
| O(23)-Ba(5)-O(17) | 114.57(1) | O(7)-Ba(4)-O(1)  | 73.46(8)  | O(24)-Ba(8)-O(3) | 68.22(9)  |
| O(14)-Ba(5)-O(17) | 66.30(9)  | O(27)-Ba(6)-O(2) | 70.04(8)  | O(33)-Ba(8)-O(3) | 94.35(9)  |
| O(15)-Ba(5)-O(17) | 72.42(1)  | O(22)-Ba(6)-O(2) | 114.02(9) | O(32)-Ba(8)-O(3) | 46.60(9)  |
| O(18)-Ba(5)-O(17) | 45.02(1)  | O(27)-Ba(6)-O(2) | 141.08(8) | O(36)-Ba(9)-O(3) | 141.86(8) |
| O(26)-Ba(5)-O(16) | 106.35(1) | O(22)-Ba(6)-O(2) | 66.87(1)  | O(36)-Ba(9)-O(3) | 66.36(9)  |
| O(23)-Ba(5)-O(16) | 74.21(9)  | O(16)-Ba(6)-O(2) | 148.83(8) | O(36)-Ba(9)-O(8) | 68.12(8)  |
| O(14)-Ba(5)-O(16) | 111.28(8) | O(27)-Ba(6)-O(2) | 68.12(9)  | O(32)-Ba(9)-O(8) | 149.94(9) |
| O(15)-Ba(5)-O(16) | 45.79(9)  | O(22)-Ba(6)-O(2) | 46.20(9)  | O(34)-Ba(9)-O(8) | 71.22(9)  |
| O(18)-Ba(5)-O(16) | 84.20(1)  | O(16)-Ba(6)-O(2) | 72.10(9)  | O(36)-Ba(9)-O(3) | 100.80(9) |
| O(17)-Ba(5)-O(16) | 103.16(9) | O(25)-Ba(6)-O(2) | 112.73(9) | O(32)-Ba(9)-O(3) | 68.38(9)  |
| O(26)-Ba(5)-O(27) | 46.09(1)  | O(22)-Ba(7)-O(3) | 166.44(9) | O(34)-Ba(9)-O(3) | 45.45(9)  |
| O(23)-Ba(5)-O(27) | 67.13(9)  | O(22)-Ba(7)-O(2) | 66.82(1)  | O(8)-Ba(9)-O(3)  | 111.15(9) |

---

**Table S5.** Surface area of the alkaline-earth metal MOFs.

| <b>MOFs</b> | <b>SA<sub>BET</sub> (m<sup>2</sup>g<sup>-1</sup>)</b> | <b>SA<sub>Lang</sub> (m<sup>2</sup>g<sup>-1</sup>)</b> |
|-------------|-------------------------------------------------------|--------------------------------------------------------|
| Mg-TCMTB    | 33.7                                                  | 93.8                                                   |
| Ca-TCMTB    | 3.8                                                   | 12.7                                                   |
| Sr-TCMTB    | 4.4                                                   | 17.8                                                   |
| Ba-TCMTB    | 7.2                                                   | 13.6                                                   |

#####

1: Mg-TCMTB

#####

Topology for Mg1

-----

Atom Mg1 links by bridge ligands and has

| Common vertex with |        |        |         |          | R(A-A)  | f |
|--------------------|--------|--------|---------|----------|---------|---|
| Mg 4               | 0.7953 | 0.8462 | 0.4615  | ( 1 0 0) | 5.284A  | 1 |
| Mg 2               | 0.7060 | 1.3224 | 1.0177  | ( 1 0 1) | 19.002A | 1 |
| Mg 1               | 0.4894 | 1.3324 | 0.9682  | ( 1 0 1) | 19.020A | 1 |
| Mg 1               | 0.4894 | 0.3324 | 0.9682  | ( 1-1 1) | 19.020A | 1 |
| Mg 1               | 0.5106 | 0.8324 | -0.4682 | ( 0 0-1) | 19.114A | 1 |
| Mg 1               | 0.5106 | 0.8324 | 1.5318  | ( 0 0 1) | 19.114A | 1 |
| Mg 2               | 0.2940 | 0.8224 | 1.4823  | ( 0 0 1) | 19.390A | 1 |
| Mg 2               | 0.2940 | 0.8224 | -0.5177 | ( 0 0-1) | 19.485A | 1 |
| Mg 2               | 0.7060 | 0.3224 | 1.0177  | ( 1-1 1) | 19.600A | 1 |
| Mg 2               | 0.7060 | 1.3224 | 0.0177  | ( 1 0 0) | 20.059A | 1 |
| Mg 1               | 0.4894 | 1.3324 | -0.0318 | ( 1 0 0) | 20.122A | 1 |
| Mg 1               | 0.4894 | 0.3324 | -0.0318 | ( 1-1 0) | 20.122A | 1 |
| Mg 2               | 0.7060 | 0.3224 | 0.0177  | ( 1-1 0) | 20.626A | 1 |

Common face with

|      |        |        |        |          | R(A-A) | f |
|------|--------|--------|--------|----------|--------|---|
| Mg 2 | 0.2940 | 0.8224 | 0.4823 | ( 0 0 0) | 3.531A | 3 |

Topology for Mg2

-----

Atom Mg2 links by bridge ligands and has

| Common vertex with |        |        |         |          | R(A-A)  | f |
|--------------------|--------|--------|---------|----------|---------|---|
| Mg 3               | 0.0045 | 0.8750 | 0.4936  | ( 0 0 0) | 5.222A  | 1 |
| Mg 1               | 0.4894 | 0.3324 | 0.9682  | ( 1-1 1) | 19.002A | 1 |
| Mg 2               | 0.2940 | 0.8224 | 1.4823  | ( 0 0 1) | 19.114A | 1 |
| Mg 2               | 0.2940 | 0.8224 | -0.5177 | ( 0 0-1) | 19.114A | 1 |
| Mg 1               | 0.5106 | 0.8324 | -0.4682 | ( 0 0-1) | 19.390A | 1 |
| Mg 1               | 0.5106 | 0.8324 | 1.5318  | ( 0 0 1) | 19.485A | 1 |
| Mg 1               | 0.4894 | 1.3324 | 0.9682  | ( 1 0 1) | 19.600A | 1 |
| Mg 1               | 0.4894 | 0.3324 | -0.0318 | ( 1-1 0) | 20.059A | 1 |
| Mg 2               | 0.7060 | 1.3224 | 1.0177  | ( 1 0 1) | 20.199A | 1 |
| Mg 2               | 0.7060 | 0.3224 | 1.0177  | ( 1-1 1) | 20.199A | 1 |
| Mg 1               | 0.4894 | 1.3324 | -0.0318 | ( 1 0 0) | 20.626A | 1 |
| Mg 2               | 0.7060 | 1.3224 | 0.0177  | ( 1 0 0) | 21.152A | 1 |
| Mg 2               | 0.7060 | 0.3224 | 0.0177  | ( 1-1 0) | 21.152A | 1 |

Common face with

|      |        |        |        |          | R(A-A) | f |
|------|--------|--------|--------|----------|--------|---|
| Mg 1 | 0.5106 | 0.8324 | 0.5318 | ( 0 0 0) | 3.531A | 3 |

Topology for Mg3

-----

Atom Mg3 links by bridge ligands and has

| Common vertex with |         |        |         |          | R(A-A)  | f |
|--------------------|---------|--------|---------|----------|---------|---|
| Mg 2               | 0.2940  | 0.8224 | 0.4823  | ( 0 0 0) | 5.222A  | 1 |
| Mg 4               | 0.2047  | 1.3462 | 0.0385  | ( 0 1 0) | 18.960A | 1 |
| Mg 4               | 0.2047  | 1.3462 | 1.0385  | ( 0 1 1) | 18.989A | 1 |
| Mg 3               | 0.0045  | 0.8750 | 1.4936  | ( 0 0 1) | 19.114A | 1 |
| Mg 3               | 0.0045  | 0.8750 | -0.5064 | ( 0 0-1) | 19.114A | 1 |
| Mg 4               | -0.2047 | 0.8462 | -0.5385 | ( 0 0-1) | 19.188A | 1 |
| Mg 3               | -0.0045 | 0.3750 | 0.0064  | ( 0-1 0) | 19.407A | 1 |
| Mg 3               | -0.0045 | 1.3750 | 0.0064  | ( 0 0 0) | 19.407A | 1 |
| Mg 3               | -0.0045 | 0.3750 | 1.0064  | ( 0-1 1) | 19.683A | 1 |
| Mg 3               | -0.0045 | 1.3750 | 1.0064  | ( 0 0 1) | 19.683A | 1 |
| Mg 4               | -0.2047 | 0.8462 | 1.4615  | ( 0 0 1) | 19.687A | 1 |
| Mg 4               | 0.2047  | 0.3462 | 0.0385  | ( 0 0 0) | 20.648A | 1 |
| Mg 4               | 0.2047  | 0.3462 | 1.0385  | ( 0 0 1) | 20.674A | 1 |

Common face with

|      |         |        |        |          | R(A-A) | f |
|------|---------|--------|--------|----------|--------|---|
| Mg 4 | -0.2047 | 0.8462 | 0.4615 | ( 0 0 0) | 3.542A | 3 |

Topology for Mg4

-----

Atom Mg4 links by bridge ligands and has

| Common vertex with |         |         |         |          | R(A-A)  | f |
|--------------------|---------|---------|---------|----------|---------|---|
| Mg 1               | 0.4894  | 0.3324  | -0.0318 | ( 1-1 0) | 5.284A  | 1 |
| Mg 3               | 0.0045  | -0.1250 | 0.4936  | ( 0-1 0) | 18.960A | 1 |
| Mg 3               | 0.0045  | -0.1250 | -0.5064 | ( 0-1-1) | 18.989A | 1 |
| Mg 4               | 0.2047  | 0.3462  | -0.9615 | ( 0 0-1) | 19.114A | 1 |
| Mg 4               | 0.2047  | 0.3462  | 1.0385  | ( 0 0 1) | 19.114A | 1 |
| Mg 3               | -0.0045 | 0.3750  | -0.9936 | ( 0-1-1) | 19.188A | 1 |
| Mg 3               | -0.0045 | 0.3750  | 1.0064  | ( 0-1 1) | 19.687A | 1 |
| Mg 4               | -0.2047 | -0.1538 | -0.5385 | ( 0-1-1) | 20.538A | 1 |
| Mg 4               | -0.2047 | 0.8462  | -0.5385 | ( 0 0-1) | 20.538A | 1 |
| Mg 3               | 0.0045  | 0.8750  | 0.4936  | ( 0 0 0) | 20.648A | 1 |
| Mg 3               | 0.0045  | 0.8750  | -0.5064 | ( 0 0-1) | 20.674A | 1 |
| Mg 4               | -0.2047 | -0.1538 | 0.4615  | ( 0-1 0) | 20.747A | 1 |
| Mg 4               | -0.2047 | 0.8462  | 0.4615  | ( 0 0 0) | 20.747A | 1 |

Common face with

|  |  |  |  |  | R(A-A) | f |
|--|--|--|--|--|--------|---|
|  |  |  |  |  | R(A-A) |   |





#####

1:Ca-TCMTB

#####

Topology for Ca1

-----

Atom Ca1 links by bridge ligands and has

| Common vertex with |         |         |         |          | R(A-A)  | f |
|--------------------|---------|---------|---------|----------|---------|---|
| Ca 3               | -0.6711 | -0.8252 | -0.0895 | (-1-1-1) | 18.831A | 1 |
| Ca 2               | -0.0901 | -0.8176 | -0.1990 | (-1-1-1) | 18.919A | 1 |
| Ca 2               | -0.0901 | -0.8176 | 0.8010  | (-1-1 0) | 18.982A | 1 |
| Ca 3               | 0.3289  | 1.1748  | 0.9105  | ( 0 1 0) | 19.384A | 1 |
| Ca 3               | 0.3289  | -0.8252 | -0.0895 | ( 0-1-1) | 19.929A | 1 |
| Ca 2               | -0.0901 | 0.1824  | -0.1990 | (-1 0-1) | 20.129A | 1 |
| Ca 1               | 0.1435  | 1.1229  | 0.7554  | ( 0 1 0) | 20.203A | 1 |
| Ca 1               | 0.1435  | -0.8771 | 0.7554  | ( 0-1 0) | 20.203A | 1 |
| Ca 1               | 0.1435  | 0.1229  | -0.2446 | ( 0 0-1) | 20.451A | 1 |
| Ca 1               | 0.1435  | 0.1229  | 1.7554  | ( 0 0 1) | 20.451A | 1 |
| Ca 1               | 0.1435  | -0.8771 | -0.2446 | ( 0-1-1) | 20.882A | 1 |
| Ca 1               | 0.1435  | 1.1229  | 1.7554  | ( 0 1 1) | 20.882A | 1 |
| Ca 2               | 0.9099  | 1.1824  | 0.8010  | ( 0 1 0) | 21.461A | 1 |
| Ca 2               | -0.0901 | 0.1824  | 1.8010  | (-1 0 1) | 21.580A | 1 |
| Ca 3               | -0.6711 | -0.8252 | 0.9105  | (-1-1 0) | 22.128A | 1 |
| Ca 3               | 0.3289  | 1.1748  | 1.9105  | ( 0 1 1) | 22.383A | 1 |
| Ca 1               | -0.8565 | -0.8771 | 0.7554  | (-1-1 0) | 22.428A | 1 |
| Ca 1               | 1.1435  | 1.1229  | 0.7554  | ( 1 1 0) | 22.428A | 1 |

Common edge with

|      |        |        |         |          | R(A-A)  | f |
|------|--------|--------|---------|----------|---------|---|
| Ca 3 | 0.3289 | 0.1748 | -0.0895 | ( 0 0-1) | 18.273A | 2 |

Common face with

|      |         |        |        |          | R(A-A) | f |
|------|---------|--------|--------|----------|--------|---|
| Ca 3 | 0.3289  | 0.1748 | 0.9105 | ( 0 0 0) | 3.610A | 3 |
| Ca 2 | -0.0901 | 0.1824 | 0.8010 | (-1 0 0) | 4.145A | 3 |

Topology for Ca2

-----

Atom Ca2 links by bridge ligands and has

| Common vertex with |        |         |         |          | R(A-A)  | f |
|--------------------|--------|---------|---------|----------|---------|---|
| Ca 3               | 1.3289 | 0.1748  | 0.9105  | ( 1 0 0) | 6.727A  | 1 |
| Ca 3               | 1.3289 | 1.1748  | 0.9105  | ( 1 1 0) | 18.518A | 1 |
| Ca 3               | 0.3289 | -0.8252 | -0.0895 | ( 0-1-1) | 18.907A | 1 |
| Ca 1               | 1.1435 | 1.1229  | 1.7554  | ( 1 1 1) | 18.919A | 1 |
| Ca 1               | 1.1435 | 1.1229  | 0.7554  | ( 1 1 0) | 18.982A | 1 |
| Ca 3               | 1.3289 | 0.1748  | -0.0895 | ( 1 0-1) | 19.909A | 1 |
| Ca 1               | 1.1435 | 0.1229  | 1.7554  | ( 1 0 1) | 20.129A | 1 |
| Ca 2               | 0.9099 | 0.1824  | -0.1990 | ( 0 0-1) | 20.451A | 1 |
| Ca 2               | 0.9099 | 0.1824  | 1.8010  | ( 0 0 1) | 20.451A | 1 |
| Ca 3               | 1.3289 | 1.1748  | 1.9105  | ( 1 1 1) | 20.926A | 1 |
| Ca 1               | 0.1435 | -0.8771 | 0.7554  | ( 0-1 0) | 21.461A | 1 |
| Ca 3               | 0.3289 | -0.8252 | 0.9105  | ( 0-1 0) | 21.501A | 1 |
| Ca 1               | 1.1435 | 0.1229  | -0.2446 | ( 1 0-1) | 21.580A | 1 |

Common face with

|      |        |        |        |          | R(A-A) | f |
|------|--------|--------|--------|----------|--------|---|
| Ca 1 | 1.1435 | 0.1229 | 0.7554 | ( 1 0 0) | 4.145A | 3 |

Topology for Ca3

-----

Atom Ca3 links by bridge ligands and has

| Common vertex with |         |         |         |          | R(A-A)  | f |
|--------------------|---------|---------|---------|----------|---------|---|
| Ca 2               | -0.0901 | 0.1824  | 0.8010  | (-1 0 0) | 6.727A  | 1 |
| Ca 2               | -0.0901 | -0.8176 | 0.8010  | (-1-1 0) | 18.518A | 1 |
| Ca 1               | 1.1435  | 1.1229  | 1.7554  | ( 1 1 1) | 18.831A | 1 |
| Ca 2               | 0.9099  | 1.1824  | 1.8010  | ( 0 1 1) | 18.907A | 1 |
| Ca 1               | 0.1435  | -0.8771 | 0.7554  | ( 0-1 0) | 19.384A | 1 |
| Ca 2               | -0.0901 | 0.1824  | 1.8010  | (-1 0 1) | 19.909A | 1 |
| Ca 1               | 0.1435  | 1.1229  | 1.7554  | ( 0 1 1) | 19.929A | 1 |
| Ca 3               | 0.3289  | 0.1748  | 1.9105  | ( 0 0 1) | 20.451A | 1 |
| Ca 3               | 0.3289  | 0.1748  | -0.0895 | ( 0 0-1) | 20.451A | 1 |
| Ca 3               | 0.3289  | 1.1748  | 1.9105  | ( 0 1 1) | 20.882A | 1 |
| Ca 3               | 0.3289  | -0.8252 | -0.0895 | ( 0-1-1) | 20.882A | 1 |
| Ca 2               | -0.0901 | -0.8176 | -0.1990 | (-1-1-1) | 20.926A | 1 |
| Ca 2               | 0.9099  | 1.1824  | 0.8010  | ( 0 1 0) | 21.501A | 1 |
| Ca 1               | 1.1435  | 1.1229  | 0.7554  | ( 1 1 0) | 22.128A | 1 |
| Ca 1               | 0.1435  | -0.8771 | -0.2446 | ( 0-1-1) | 22.383A | 1 |

Common edge with

|      |        |        |        |          | R(A-A)  | f |
|------|--------|--------|--------|----------|---------|---|
| Ca 1 | 0.1435 | 0.1229 | 1.7554 | ( 0 0 1) | 18.273A | 2 |

Common face with

|      |        |        |        |          | R(A-A) | f |
|------|--------|--------|--------|----------|--------|---|
| Ca 1 | 0.1435 | 0.1229 | 0.7554 | ( 0 0 0) | 3.610A | 3 |

-----

Structural group analysis

-----

-----  
Structural group No.1



#####

1:Sr-TCMTB

#####

Topology for Sr1

-----

Atom Sr1 links by bridge ligands and has

| Common vertex with |         |         |         |          | R(A-A)  | f |
|--------------------|---------|---------|---------|----------|---------|---|
| Sr 2               | 0.1137  | -0.5685 | 0.3273  | ( 0-1 0) | 18.400A | 1 |
| Sr 3               | -0.0706 | -0.6942 | 1.3522  | (-1-1 1) | 19.400A | 1 |
| Sr 4               | -0.3025 | -0.6384 | 1.3449  | (-1-1 1) | 19.458A | 1 |
| Sr 1               | 0.2947  | -0.7044 | 0.3965  | ( 0-1 0) | 19.681A | 1 |
| Sr 1               | 0.2947  | 1.2956  | 0.3965  | ( 0 1 0) | 19.681A | 1 |
| Sr 3               | -0.0706 | 1.3058  | 0.3522  | (-1 1 0) | 19.781A | 1 |
| Sr 4               | -0.3025 | 0.3616  | 1.3449  | (-1 0 1) | 19.916A | 1 |
| Sr 2               | 0.1137  | 0.4315  | 1.3273  | ( 0 0 1) | 20.409A | 1 |
| Sr 1               | 0.2947  | -0.7044 | 1.3965  | ( 0-1 1) | 20.424A | 1 |
| Sr 1               | 0.2947  | 1.2956  | -0.6035 | ( 0 1-1) | 20.424A | 1 |
| Sr 1               | 0.2947  | 0.2956  | -0.6035 | ( 0 0-1) | 21.132A | 1 |
| Sr 1               | 0.2947  | 0.2956  | 1.3965  | ( 0 0 1) | 21.132A | 1 |
| Sr 2               | 0.1137  | 1.4315  | 0.3273  | ( 0 1 0) | 21.599A | 1 |

Common edge with

|      |         |         |        |          | R(A-A)  | f |
|------|---------|---------|--------|----------|---------|---|
| Sr 3 | -0.0706 | 0.3058  | 0.3522 | (-1 0 0) | 6.297A  | 2 |
| Sr 2 | 0.1137  | -0.5685 | 1.3273 | ( 0-1 1) | 17.975A | 2 |
| Sr 3 | -0.0706 | 0.3058  | 1.3522 | (-1 0 1) | 19.237A | 2 |

Common face with

|      |        |        |        |          | R(A-A) | f |
|------|--------|--------|--------|----------|--------|---|
| Sr 2 | 0.1137 | 0.4315 | 0.3273 | ( 0 0 0) | 3.898A | 3 |

Topology for Sr2

-----

Atom Sr2 links by bridge ligands and has

| Common vertex with |         |         |         |          | R(A-A)  | f |
|--------------------|---------|---------|---------|----------|---------|---|
| Sr 4               | -0.3025 | 0.3616  | 0.3449  | (-1 0 0) | 6.934A  | 1 |
| Sr 1               | 0.2947  | 1.2956  | 0.3965  | ( 0 1 0) | 18.400A | 1 |
| Sr 4               | -0.3025 | 1.3616  | 0.3449  | (-1 1 0) | 18.975A | 1 |
| Sr 2               | 0.1137  | 1.4315  | 0.3273  | ( 0 1 0) | 19.681A | 1 |
| Sr 2               | 0.1137  | -0.5685 | 0.3273  | ( 0-1 0) | 19.681A | 1 |
| Sr 4               | -0.3025 | 0.3616  | 1.3449  | (-1 0 1) | 19.730A | 1 |
| Sr 3               | -0.0706 | 0.3058  | 1.3522  | (-1 0 1) | 19.758A | 1 |
| Sr 3               | -0.0706 | 1.3058  | -0.6478 | (-1 1-1) | 20.077A | 1 |
| Sr 1               | 0.2947  | 0.2956  | -0.6035 | ( 0 0-1) | 20.409A | 1 |
| Sr 2               | 0.1137  | 1.4315  | -0.6727 | ( 0 1-1) | 20.424A | 1 |
| Sr 2               | 0.1137  | -0.5685 | 1.3273  | ( 0-1 1) | 20.424A | 1 |
| Sr 4               | -0.3025 | -0.6384 | 1.3449  | (-1-1 1) | 20.862A | 1 |
| Sr 3               | -0.0706 | -0.6942 | 1.3522  | (-1-1 1) | 21.462A | 1 |
| Sr 1               | 0.2947  | -0.7044 | 0.3965  | ( 0-1 0) | 21.599A | 1 |

Common edge with

|      |         |        |         |          | R(A-A)  | f |
|------|---------|--------|---------|----------|---------|---|
| Sr 3 | -0.0706 | 1.3058 | 0.3522  | (-1 1 0) | 17.390A | 2 |
| Sr 1 | 0.2947  | 1.2956 | -0.6035 | ( 0 1-1) | 17.975A | 2 |

Common face with

|      |         |        |        |          | R(A-A) | f |
|------|---------|--------|--------|----------|--------|---|
| Sr 3 | -0.0706 | 0.3058 | 0.3522 | (-1 0 0) | 3.838A | 3 |
| Sr 1 | 0.2947  | 0.2956 | 0.3965 | ( 0 0 0) | 3.898A | 3 |

Topology for Sr3

-----

Atom Sr3 links by bridge ligands and has

| Common vertex with |        |         |         |          | R(A-A)  | f |
|--------------------|--------|---------|---------|----------|---------|---|
| Sr 4               | 0.6975 | -0.6384 | 1.3449  | ( 0-1 1) | 19.319A | 1 |
| Sr 1               | 1.2947 | 1.2956  | -0.6035 | ( 1 1-1) | 19.400A | 1 |
| Sr 4               | 0.6975 | -0.6384 | 0.3449  | ( 0-1 0) | 19.440A | 1 |
| Sr 3               | 0.9294 | 1.3058  | 0.3522  | ( 0 1 0) | 19.681A | 1 |
| Sr 3               | 0.9294 | -0.6942 | 0.3522  | ( 0-1 0) | 19.681A | 1 |
| Sr 2               | 1.1137 | 0.4315  | -0.6727 | ( 1 0-1) | 19.758A | 1 |
| Sr 1               | 1.2947 | -0.7044 | 0.3965  | ( 1-1 0) | 19.781A | 1 |
| Sr 2               | 1.1137 | -0.5685 | 1.3273  | ( 1-1 1) | 20.077A | 1 |
| Sr 3               | 0.9294 | -0.6942 | 1.3522  | ( 0-1 1) | 20.424A | 1 |
| Sr 3               | 0.9294 | 1.3058  | -0.6478 | ( 0 1-1) | 20.424A | 1 |
| Sr 4               | 0.6975 | 1.3616  | 0.3449  | ( 0 1 0) | 20.653A | 1 |
| Sr 4               | 0.6975 | 0.3616  | 1.3449  | ( 0 0 1) | 20.664A | 1 |
| Sr 3               | 0.9294 | 0.3058  | 1.3522  | ( 0 0 1) | 21.132A | 1 |
| Sr 3               | 0.9294 | 0.3058  | -0.6478 | ( 0 0-1) | 21.132A | 1 |
| Sr 2               | 1.1137 | 1.4315  | -0.6727 | ( 1 1-1) | 21.462A | 1 |

Common edge with

|      |        |         |         |          | R(A-A)  | f |
|------|--------|---------|---------|----------|---------|---|
| Sr 1 | 1.2947 | 0.2956  | 0.3965  | ( 1 0 0) | 6.297A  | 2 |
| Sr 2 | 1.1137 | -0.5685 | 0.3273  | ( 1-1 0) | 17.390A | 2 |
| Sr 1 | 1.2947 | 0.2956  | -0.6035 | ( 1 0-1) | 19.237A | 2 |

Common face with

|      |        |        |        |          | R(A-A) | f |
|------|--------|--------|--------|----------|--------|---|
| Sr 2 | 1.1137 | 0.4315 | 0.3273 | ( 1 0 0) | 3.838A | 3 |
| Sr 4 | 0.6975 | 0.3616 | 0.3449 | ( 0 0 0) | 3.858A | 3 |

Topology for Sr4

-----



#####  
1:Ba-TCMTB  
#####

Topology for Ba1

-----

Atom Ba1 links by bridge ligands and has

| Common vertex with |         |         |         |           | R(A-A)  | f |
|--------------------|---------|---------|---------|-----------|---------|---|
| Ba 3               | 0.6102  | 0.6650  | 0.2962  | ( 0 0 0)  | 7.171A  | 1 |
| Ba 8               | 0.6387  | 0.7258  | -0.1569 | ( 0 0 -1) | 7.306A  | 1 |
| Ba 9               | 0.7004  | 1.6147  | -0.0235 | ( 0 1 -1) | 18.489A | 1 |
| Ba 7               | 0.6554  | 1.6018  | -0.2477 | ( 0 1 -1) | 18.688A | 1 |
| Ba 9               | -0.2996 | 0.6147  | -0.0235 | (-1 0 -1) | 18.731A | 1 |
| Ba 2               | -0.2917 | 1.6865  | 0.1693  | (-1 1 0)  | 18.811A | 1 |
| Ba 4               | -0.3101 | 0.7171  | 0.3963  | (-1 0 0)  | 19.024A | 1 |
| Ba 2               | 0.7083  | -0.3135 | 0.1693  | ( 0 -1 0) | 19.285A | 1 |
| Ba 7               | -0.3446 | 1.6018  | -0.2477 | (-1 1 -1) | 19.406A | 1 |
| Ba 1               | -0.4422 | 0.7403  | 0.0696  | (-1 0 0)  | 19.519A | 1 |
| Ba 1               | 1.5578  | 0.7403  | 0.0696  | ( 1 0 0)  | 19.519A | 1 |
| Ba 8               | -0.3613 | 1.7258  | -0.1569 | (-1 1 -1) | 19.584A | 1 |
| Ba 3               | -0.3898 | 0.6650  | 0.2962  | (-1 0 0)  | 19.706A | 1 |
| Ba 4               | 0.6899  | -0.2829 | 0.3963  | ( 0 -1 0) | 19.741A | 1 |
| Ba 1               | -0.4422 | 1.7403  | 0.0696  | (-1 1 0)  | 20.042A | 1 |
| Ba 1               | 1.5578  | -0.2597 | 0.0696  | ( 1 -1 0) | 20.042A | 1 |
| Ba 8               | 0.6387  | 1.7258  | -0.1569 | ( 0 1 -1) | 20.082A | 1 |
| Ba 3               | 0.6102  | -0.3350 | 0.2962  | ( 0 -1 0) | 20.554A | 1 |
| Ba 9               | 1.7004  | 0.6147  | -0.0235 | ( 1 0 -1) | 21.135A | 1 |
| Ba 8               | 1.6387  | 0.7258  | -0.1569 | ( 1 0 -1) | 21.402A | 1 |
| Ba 3               | 1.6102  | -0.3350 | 0.2962  | ( 1 -1 0) | 21.691A | 1 |
| Ba 2               | 1.7083  | -0.3135 | 0.1693  | ( 1 -1 0) | 22.013A | 1 |

| Common edge with |         |        |         |           | R(A-A)  | f |
|------------------|---------|--------|---------|-----------|---------|---|
| Ba 2             | -0.2917 | 0.6865 | 0.1693  | (-1 0 0)  | 17.024A | 2 |
| Ba 9             | -0.2996 | 1.6147 | -0.0235 | (-1 1 -1) | 17.260A | 2 |

| Common face with |        |        |         |           | R(A-A) | f |
|------------------|--------|--------|---------|-----------|--------|---|
| Ba 2             | 0.7083 | 0.6865 | 0.1693  | ( 0 0 0)  | 4.187A | 3 |
| Ba 9             | 0.7004 | 0.6147 | -0.0235 | ( 0 0 -1) | 4.215A | 3 |

Topology for Ba2

-----

Atom Ba2 links by bridge ligands and has

| Common vertex with |         |         |         |           | R(A-A)  | f |
|--------------------|---------|---------|---------|-----------|---------|---|
| Ba 4               | 0.6899  | 0.7171  | 0.3963  | ( 0 0 0)  | 7.408A  | 1 |
| Ba 3               | 1.6102  | 0.6650  | 0.2962  | ( 1 0 0)  | 18.304A | 1 |
| Ba 1               | 1.5578  | -0.2597 | 0.0696  | ( 1 -1 0) | 18.811A | 1 |
| Ba 9               | 1.7004  | 0.6147  | -0.0235 | ( 1 0 -1) | 19.109A | 1 |
| Ba 4               | 0.6899  | -0.2829 | 0.3963  | ( 0 -1 0) | 19.189A | 1 |
| Ba 1               | 0.5578  | 1.7403  | 0.0696  | ( 0 1 0)  | 19.285A | 1 |
| Ba 3               | 1.6102  | -0.3350 | 0.2962  | ( 1 -1 0) | 19.298A | 1 |
| Ba 2               | 1.7083  | 0.6865  | 0.1693  | ( 1 0 0)  | 19.519A | 1 |
| Ba 2               | -0.2917 | 0.6865  | 0.1693  | (-1 0 0)  | 19.519A | 1 |
| Ba 7               | 0.6554  | 1.6018  | -0.2477 | ( 0 1 -1) | 19.643A | 1 |
| Ba 9               | -0.2996 | 1.6147  | -0.0235 | (-1 1 -1) | 19.758A | 1 |
| Ba 2               | 0.7083  | -0.3135 | 0.1693  | ( 0 -1 0) | 19.943A | 1 |
| Ba 2               | 0.7083  | 1.6865  | 0.1693  | ( 0 1 0)  | 19.943A | 1 |
| Ba 2               | 1.7083  | -0.3135 | 0.1693  | ( 1 -1 0) | 20.042A | 1 |
| Ba 2               | -0.2917 | 1.6865  | 0.1693  | (-1 1 0)  | 20.042A | 1 |
| Ba 4               | -0.3101 | 0.7171  | 0.3963  | (-1 0 0)  | 20.144A | 1 |
| Ba 8               | 1.6387  | 0.7258  | -0.1569 | ( 1 0 -1) | 20.164A | 1 |
| Ba 8               | 0.6387  | 1.7258  | -0.1569 | ( 0 1 -1) | 20.424A | 1 |
| Ba 3               | 0.6102  | -0.3350 | 0.2962  | ( 0 -1 0) | 20.810A | 1 |
| Ba 3               | -0.3898 | 0.6650  | 0.2962  | (-1 0 0)  | 21.547A | 1 |
| Ba 1               | -0.4422 | 1.7403  | 0.0696  | (-1 1 0)  | 22.013A | 1 |

| Common edge with |        |        |         |           | R(A-A)  | f |
|------------------|--------|--------|---------|-----------|---------|---|
| Ba 9             | 0.7004 | 0.6147 | -0.0235 | ( 0 0 -1) | 6.702A  | 2 |
| Ba 1             | 1.5578 | 0.7403 | 0.0696  | ( 1 0 0)  | 17.024A | 2 |
| Ba 9             | 0.7004 | 1.6147 | -0.0235 | ( 0 1 -1) | 18.046A | 2 |

| Common face with |        |        |        |          | R(A-A) | f |
|------------------|--------|--------|--------|----------|--------|---|
| Ba 1             | 0.5578 | 0.7403 | 0.0696 | ( 0 0 0) | 4.187A | 3 |
| Ba 3             | 0.6102 | 0.6650 | 0.2962 | ( 0 0 0) | 4.321A | 3 |

Topology for Ba3

-----

Atom Ba3 links by bridge ligands and has

| Common vertex with |         |         |        |           | R(A-A)  | f |
|--------------------|---------|---------|--------|-----------|---------|---|
| Ba 1               | 0.5578  | 0.7403  | 0.0696 | ( 0 0 0)  | 7.171A  | 1 |
| Ba 5               | 0.6640  | 0.6209  | 0.5229 | ( 0 0 0)  | 7.263A  | 1 |
| Ba 4               | -0.3101 | 0.7171  | 0.3963 | (-1 0 0)  | 17.446A | 1 |
| Ba 4               | 0.6899  | -0.2829 | 0.3963 | ( 0 -1 0) | 17.741A | 1 |
| Ba 2               | -0.2917 | 0.6865  | 0.1693 | (-1 0 0)  | 18.304A | 1 |
| Ba 2               | -0.2917 | 1.6865  | 0.1693 | (-1 1 0)  | 19.298A | 1 |
| Ba 3               | -0.3898 | 0.6650  | 0.2962 | (-1 0 0)  | 19.519A | 1 |

|                  |         |         |         |          |         |   |
|------------------|---------|---------|---------|----------|---------|---|
| Ba 3             | 1.6102  | 0.6650  | 0.2962  | ( 1 0 0) | 19.519A | 1 |
| Ba 1             | 1.5578  | 0.7403  | 0.0696  | ( 1 0 0) | 19.706A | 1 |
| Ba 5             | 0.6640  | -0.3791 | 0.5229  | ( 0-1 0) | 19.961A | 1 |
| Ba 6             | 0.7769  | -0.3850 | 0.6304  | ( 0-1 0) | 20.067A | 1 |
| Ba 9             | 0.7004  | 1.6147  | -0.0235 | ( 0 1-1) | 20.145A | 1 |
| Ba 9             | -0.2996 | 1.6147  | -0.0235 | (-1 1-1) | 20.148A | 1 |
| Ba 4             | 1.6899  | -0.2829 | 0.3963  | ( 1-1 0) | 20.333A | 1 |
| Ba 1             | 0.5578  | 1.7403  | 0.0696  | ( 0 1 0) | 20.554A | 1 |
| Ba 2             | 0.7083  | 1.6865  | 0.1693  | ( 0 1 0) | 20.810A | 1 |
| Ba 5             | 1.6640  | -0.3791 | 0.5229  | ( 1-1 0) | 21.430A | 1 |
| Ba 2             | 1.7083  | 0.6865  | 0.1693  | ( 1 0 0) | 21.547A | 1 |
| Ba 1             | -0.4422 | 1.7403  | 0.0696  | (-1 1 0) | 21.691A | 1 |
| Common face with |         |         |         |          | R(A-A)  |   |
| Ba 4             | 0.6899  | 0.7171  | 0.3963  | ( 0 0 0) | 4.252A  | 3 |
| Ba 2             | 0.7083  | 0.6865  | 0.1693  | ( 0 0 0) | 4.321A  | 3 |

Topology for Ba4

-----  
Atom Ba4 links by bridge ligands and has

|                    |         |         |         |          |         |   |
|--------------------|---------|---------|---------|----------|---------|---|
| Common vertex with |         |         |         |          | R(A-A)  | f |
| Ba 2               | 0.7083  | 0.6865  | 0.1693  | ( 0 0 0) | 7.408A  | 1 |
| Ba 6               | 0.7769  | 0.6150  | 0.6304  | ( 0 0 0) | 7.485A  | 1 |
| Ba 3               | 1.6102  | 0.6650  | 0.2962  | ( 1 0 0) | 17.446A | 1 |
| Ba 3               | 0.6102  | 1.6650  | 0.2962  | ( 0 1 0) | 17.741A | 1 |
| Ba 5               | 1.6640  | 0.6209  | 0.5229  | ( 1 0 0) | 18.986A | 1 |
| Ba 1               | 1.5578  | 0.7403  | 0.0696  | ( 1 0 0) | 19.024A | 1 |
| Ba 5               | 0.6640  | 1.6209  | 0.5229  | ( 0 1 0) | 19.133A | 1 |
| Ba 2               | 0.7083  | 1.6865  | 0.1693  | ( 0 1 0) | 19.189A | 1 |
| Ba 6               | -0.2231 | 0.6150  | 0.6304  | (-1 0 0) | 19.381A | 1 |
| Ba 4               | -0.3101 | 0.7171  | 0.3963  | (-1 0 0) | 19.519A | 1 |
| Ba 4               | 1.6899  | 0.7171  | 0.3963  | ( 1 0 0) | 19.519A | 1 |
| Ba 1               | 0.5578  | 1.7403  | 0.0696  | ( 0 1 0) | 19.741A | 1 |
| Ba 9               | 0.7004  | 1.6147  | -0.0235 | ( 0 1-1) | 19.849A | 1 |
| Ba 4               | 0.6899  | 1.7171  | 0.3963  | ( 0 1 0) | 19.943A | 1 |
| Ba 4               | 0.6899  | -0.2829 | 0.3963  | ( 0-1 0) | 19.943A | 1 |
| Ba 4               | -0.3101 | 1.7171  | 0.3963  | (-1 1 0) | 20.042A | 1 |
| Ba 4               | 1.6899  | -0.2829 | 0.3963  | ( 1-1 0) | 20.042A | 1 |
| Ba 2               | 1.7083  | 0.6865  | 0.1693  | ( 1 0 0) | 20.144A | 1 |
| Ba 5               | -0.3360 | 1.6209  | 0.5229  | (-1 1 0) | 20.196A | 1 |
| Ba 3               | -0.3898 | 1.6650  | 0.2962  | (-1 1 0) | 20.333A | 1 |
| Ba 5               | 1.6640  | -0.3791 | 0.5229  | ( 1-1 0) | 20.740A | 1 |
| Ba 6               | 0.7769  | -0.3850 | 0.6304  | ( 0-1 0) | 20.812A | 1 |
| Ba 5               | -0.3360 | 0.6209  | 0.5229  | (-1 0 0) | 20.885A | 1 |
| Ba 5               | 0.6640  | -0.3791 | 0.5229  | ( 0-1 0) | 21.542A | 1 |
| Common face with   |         |         |         |          | R(A-A)  |   |
| Ba 5               | 0.6640  | 0.6209  | 0.5229  | ( 0 0 0) | 4.164A  | 3 |
| Ba 3               | 0.6102  | 0.6650  | 0.2962  | ( 0 0 0) | 4.252A  | 3 |

Topology for Ba5

-----  
Atom Ba5 links by bridge ligands and has

|                    |         |         |        |          |         |   |
|--------------------|---------|---------|--------|----------|---------|---|
| Common vertex with |         |         |        |          | R(A-A)  | f |
| Ba 3               | 0.6102  | 0.6650  | 0.2962 | ( 0 0 0) | 7.263A  | 1 |
| Ba 7               | 0.6554  | 0.6018  | 0.7523 | ( 0 0 0) | 7.273A  | 1 |
| Ba 8               | 0.6387  | -0.2742 | 0.8431 | ( 0-1 0) | 18.639A | 1 |
| Ba 4               | -0.3101 | 0.7171  | 0.3963 | (-1 0 0) | 18.986A | 1 |
| Ba 4               | 0.6899  | -0.2829 | 0.3963 | ( 0-1 0) | 19.133A | 1 |
| Ba 5               | -0.3360 | 0.6209  | 0.5229 | (-1 0 0) | 19.519A | 1 |
| Ba 5               | 1.6640  | 0.6209  | 0.5229 | ( 1 0 0) | 19.519A | 1 |
| Ba 6               | -0.2231 | 1.6150  | 0.6304 | (-1 1 0) | 19.751A | 1 |
| Ba 5               | 0.6640  | -0.3791 | 0.5229 | ( 0-1 0) | 19.943A | 1 |
| Ba 5               | 0.6640  | 1.6209  | 0.5229 | ( 0 1 0) | 19.943A | 1 |
| Ba 3               | 0.6102  | 1.6650  | 0.2962 | ( 0 1 0) | 19.961A | 1 |
| Ba 7               | 0.6554  | -0.3982 | 0.7523 | ( 0-1 0) | 20.035A | 1 |
| Ba 4               | 1.6899  | -0.2829 | 0.3963 | ( 1-1 0) | 20.196A | 1 |
| Ba 7               | -0.3446 | 0.6018  | 0.7523 | (-1 0 0) | 20.364A | 1 |
| Ba 7               | 1.6554  | -0.3982 | 0.7523 | ( 1-1 0) | 20.604A | 1 |
| Ba 4               | -0.3101 | 1.7171  | 0.3963 | (-1 1 0) | 20.740A | 1 |
| Ba 8               | -0.3613 | 0.7258  | 0.8431 | (-1 0 0) | 20.802A | 1 |
| Ba 4               | 1.6899  | 0.7171  | 0.3963 | ( 1 0 0) | 20.885A | 1 |
| Ba 6               | 1.7769  | -0.3850 | 0.6304 | ( 1-1 0) | 21.199A | 1 |
| Ba 3               | -0.3898 | 1.6650  | 0.2962 | (-1 1 0) | 21.430A | 1 |
| Ba 4               | 0.6899  | 1.7171  | 0.3963 | ( 0 1 0) | 21.542A | 1 |
| Common edge with   |         |         |        |          | R(A-A)  |   |
| Ba 6               | -0.2231 | 0.6150  | 0.6304 | (-1 0 0) | 17.315A | 2 |
| Ba 6               | 0.7769  | -0.3850 | 0.6304 | ( 0-1 0) | 18.607A | 2 |
| Ba 5               | 1.6640  | -0.3791 | 0.5229 | ( 1-1 0) | 20.042A | 2 |
| Ba 5               | -0.3360 | 1.6209  | 0.5229 | (-1 1 0) | 20.042A | 2 |
| Common face with   |         |         |        |          | R(A-A)  |   |
| Ba 4               | 0.6899  | 0.7171  | 0.3963 | ( 0 0 0) | 4.164A  | 3 |
| Ba 6               | 0.7769  | 0.6150  | 0.6304 | ( 0 0 0) | 4.252A  | 3 |

## Topology for Ba6

-----

Atom Ba6 links by bridge ligands and has

| Common vertex with |         |         |        |          | R(A-A)  | f |
|--------------------|---------|---------|--------|----------|---------|---|
| Ba 8               | 0.6387  | 0.7258  | 0.8431 | ( 0 0 0) | 7.466A  | 1 |
| Ba 4               | 0.6899  | 0.7171  | 0.3963 | ( 0 0 0) | 7.485A  | 1 |
| Ba 7               | 1.6554  | 0.6018  | 0.7523 | ( 1 0 0) | 17.887A | 1 |
| Ba 8               | 0.6387  | -0.2742 | 0.8431 | ( 0-1 0) | 18.834A | 1 |
| Ba 7               | 1.6554  | -0.3982 | 0.7523 | ( 1-1 0) | 19.000A | 1 |
| Ba 4               | 1.6899  | 0.7171  | 0.3963 | ( 1 0 0) | 19.381A | 1 |
| Ba 6               | 1.7769  | 0.6150  | 0.6304 | ( 1 0 0) | 19.519A | 1 |
| Ba 6               | -0.2231 | 0.6150  | 0.6304 | (-1 0 0) | 19.519A | 1 |
| Ba 5               | 1.6640  | -0.3791 | 0.5229 | ( 1-1 0) | 19.751A | 1 |
| Ba 6               | 0.7769  | -0.3850 | 0.6304 | ( 0-1 0) | 19.943A | 1 |
| Ba 6               | 0.7769  | 1.6150  | 0.6304 | ( 0 1 0) | 19.943A | 1 |
| Ba 6               | 1.7769  | -0.3850 | 0.6304 | ( 1-1 0) | 20.042A | 1 |
| Ba 6               | -0.2231 | 1.6150  | 0.6304 | (-1 1 0) | 20.042A | 1 |
| Ba 3               | 0.6102  | 1.6650  | 0.2962 | ( 0 1 0) | 20.067A | 1 |
| Ba 4               | 0.6899  | 1.7171  | 0.3963 | ( 0 1 0) | 20.812A | 1 |
| Ba 7               | 0.6554  | -0.3982 | 0.7523 | ( 0-1 0) | 20.908A | 1 |
| Ba 5               | -0.3360 | 1.6209  | 0.5229 | (-1 1 0) | 21.199A | 1 |
| Ba 8               | -0.3613 | 0.7258  | 0.8431 | (-1 0 0) | 21.673A | 1 |
| Ba 7               | -0.3446 | 0.6018  | 0.7523 | (-1 0 0) | 21.911A | 1 |
| Common edge with   |         |         |        |          | R(A-A)  |   |
| Ba 5               | 1.6640  | 0.6209  | 0.5229 | ( 1 0 0) | 17.315A | 2 |
| Ba 5               | 0.6640  | 1.6209  | 0.5229 | ( 0 1 0) | 18.607A | 2 |
| Common face with   |         |         |        |          | R(A-A)  |   |
| Ba 5               | 0.6640  | 0.6209  | 0.5229 | ( 0 0 0) | 4.252A  | 3 |
| Ba 7               | 0.6554  | 0.6018  | 0.7523 | ( 0 0 0) | 4.362A  | 3 |

## Topology for Ba7

-----

Atom Ba7 links by bridge ligands and has

| Common vertex with |         |         |        |          | R(A-A)  | f |
|--------------------|---------|---------|--------|----------|---------|---|
| Ba 5               | 0.6640  | 0.6209  | 0.5229 | ( 0 0 0) | 7.273A  | 1 |
| Ba 9               | 0.7004  | 0.6147  | 0.9765 | ( 0 0 0) | 7.425A  | 1 |
| Ba 6               | -0.2231 | 0.6150  | 0.6304 | (-1 0 0) | 17.887A | 1 |
| Ba 8               | 1.6387  | -0.2742 | 0.8431 | ( 1-1 0) | 18.620A | 1 |
| Ba 1               | 0.5578  | -0.2597 | 1.0696 | ( 0-1 1) | 18.688A | 1 |
| Ba 8               | -0.3613 | 0.7258  | 0.8431 | (-1 0 0) | 18.733A | 1 |
| Ba 9               | 0.7004  | -0.3853 | 0.9765 | ( 0-1 0) | 18.962A | 1 |
| Ba 6               | -0.2231 | 1.6150  | 0.6304 | (-1 1 0) | 19.000A | 1 |
| Ba 1               | 1.5578  | -0.2597 | 1.0696 | ( 1-1 1) | 19.406A | 1 |
| Ba 7               | -0.3446 | 0.6018  | 0.7523 | (-1 0 0) | 19.519A | 1 |
| Ba 7               | 1.6554  | 0.6018  | 0.7523 | ( 1 0 0) | 19.519A | 1 |
| Ba 2               | 0.7083  | -0.3135 | 1.1693 | ( 0-1 1) | 19.643A | 1 |
| Ba 5               | 0.6640  | 1.6209  | 0.5229 | ( 0 1 0) | 20.035A | 1 |
| Ba 5               | 1.6640  | 0.6209  | 0.5229 | ( 1 0 0) | 20.364A | 1 |
| Ba 5               | -0.3360 | 1.6209  | 0.5229 | (-1 1 0) | 20.604A | 1 |
| Ba 9               | 1.7004  | -0.3853 | 0.9765 | ( 1-1 0) | 20.853A | 1 |
| Ba 6               | 0.7769  | 1.6150  | 0.6304 | ( 0 1 0) | 20.908A | 1 |
| Ba 6               | 1.7769  | 0.6150  | 0.6304 | ( 1 0 0) | 21.911A | 1 |
| Common face with   |         |         |        |          | R(A-A)  |   |
| Ba 8               | 0.6387  | 0.7258  | 0.8431 | ( 0 0 0) | 4.127A  | 3 |
| Ba 6               | 0.7769  | 0.6150  | 0.6304 | ( 0 0 0) | 4.362A  | 3 |

## Topology for Ba8

-----

Atom Ba8 links by bridge ligands and has

| Common vertex with |         |         |        |          | R(A-A)  | f |
|--------------------|---------|---------|--------|----------|---------|---|
| Ba 1               | 0.5578  | 0.7403  | 1.0696 | ( 0 0 1) | 7.306A  | 1 |
| Ba 6               | 0.7769  | 0.6150  | 0.6304 | ( 0 0 0) | 7.466A  | 1 |
| Ba 7               | -0.3446 | 1.6018  | 0.7523 | (-1 1 0) | 18.620A | 1 |
| Ba 5               | 0.6640  | 1.6209  | 0.5229 | ( 0 1 0) | 18.639A | 1 |
| Ba 7               | 1.6554  | 0.6018  | 0.7523 | ( 1 0 0) | 18.733A | 1 |
| Ba 6               | 0.7769  | 1.6150  | 0.6304 | ( 0 1 0) | 18.834A | 1 |
| Ba 9               | -0.2996 | 1.6147  | 0.9765 | (-1 1 0) | 19.250A | 1 |
| Ba 9               | -0.2996 | 0.6147  | 0.9765 | (-1 0 0) | 19.383A | 1 |
| Ba 1               | 1.5578  | -0.2597 | 1.0696 | ( 1-1 1) | 19.584A | 1 |
| Ba 8               | -0.3613 | 1.7258  | 0.8431 | (-1 1 0) | 20.042A | 1 |
| Ba 8               | 1.6387  | -0.2742 | 0.8431 | ( 1-1 0) | 20.042A | 1 |
| Ba 1               | 0.5578  | -0.2597 | 1.0696 | ( 0-1 1) | 20.082A | 1 |
| Ba 2               | -0.2917 | 0.6865  | 1.1693 | (-1 0 1) | 20.164A | 1 |
| Ba 2               | 0.7083  | -0.3135 | 1.1693 | ( 0-1 1) | 20.424A | 1 |
| Ba 5               | 1.6640  | 0.6209  | 0.5229 | ( 1 0 0) | 20.802A | 1 |
| Ba 9               | 0.7004  | -0.3853 | 0.9765 | ( 0-1 0) | 21.034A | 1 |
| Ba 1               | -0.4422 | 0.7403  | 1.0696 | (-1 0 1) | 21.402A | 1 |
| Ba 6               | 1.7769  | 0.6150  | 0.6304 | ( 1 0 0) | 21.673A | 1 |
| Ba 9               | 1.7004  | -0.3853 | 0.9765 | ( 1-1 0) | 21.694A | 1 |
| Common face with   |         |         |        |          | R(A-A)  |   |
| Ba 7               | 0.6554  | 0.6018  | 0.7523 | ( 0 0 0) | 4.127A  | 3 |



Ba 9 0.7004 0.6147 0.9765 ( 0 0 0) 4.350A 3  
Topology for Ba9

-----

Atom Ba9 links by bridge ligands and has

| Common vertex with |         |         |        | R(A-A)   | f       |   |
|--------------------|---------|---------|--------|----------|---------|---|
| Ba 7               | 0.6554  | 0.6018  | 0.7523 | ( 0 0 0) | 7.425A  | 1 |
| Ba 1               | 0.5578  | -0.2597 | 1.0696 | ( 0-1 1) | 18.489A | 1 |
| Ba 1               | 1.5578  | 0.7403  | 1.0696 | ( 1 0 1) | 18.731A | 1 |
| Ba 7               | 0.6554  | 1.6018  | 0.7523 | ( 0 1 0) | 18.962A | 1 |
| Ba 2               | -0.2917 | 0.6865  | 1.1693 | (-1 0 1) | 19.109A | 1 |
| Ba 8               | 1.6387  | -0.2742 | 0.8431 | ( 1-1 0) | 19.250A | 1 |
| Ba 8               | 1.6387  | 0.7258  | 0.8431 | ( 1 0 0) | 19.383A | 1 |
| Ba 9               | 1.7004  | 0.6147  | 0.9765 | ( 1 0 0) | 19.519A | 1 |
| Ba 9               | -0.2996 | 0.6147  | 0.9765 | (-1 0 0) | 19.519A | 1 |
| Ba 2               | 1.7083  | -0.3135 | 1.1693 | ( 1-1 1) | 19.758A | 1 |
| Ba 4               | 0.6899  | -0.2829 | 1.3963 | ( 0-1 1) | 19.849A | 1 |
| Ba 9               | 0.7004  | 1.6147  | 0.9765 | ( 0 1 0) | 19.943A | 1 |
| Ba 9               | 0.7004  | -0.3853 | 0.9765 | ( 0-1 0) | 19.943A | 1 |
| Ba 9               | 1.7004  | -0.3853 | 0.9765 | ( 1-1 0) | 20.042A | 1 |
| Ba 9               | -0.2996 | 1.6147  | 0.9765 | (-1 1 0) | 20.042A | 1 |
| Ba 3               | 0.6102  | -0.3350 | 1.2962 | ( 0-1 1) | 20.145A | 1 |
| Ba 3               | 1.6102  | -0.3350 | 1.2962 | ( 1-1 1) | 20.148A | 1 |
| Ba 7               | -0.3446 | 1.6018  | 0.7523 | (-1 1 0) | 20.853A | 1 |
| Ba 8               | 0.6387  | 1.7258  | 0.8431 | ( 0 1 0) | 21.034A | 1 |
| Ba 1               | -0.4422 | 0.7403  | 1.0696 | (-1 0 1) | 21.135A | 1 |
| Ba 8               | -0.3613 | 1.7258  | 0.8431 | (-1 1 0) | 21.694A | 1 |
| Common edge with   |         |         |        |          | R(A-A)  |   |
| Ba 2               | 0.7083  | 0.6865  | 1.1693 | ( 0 0 1) | 6.702A  | 2 |
| Ba 1               | 1.5578  | -0.2597 | 1.0696 | ( 1-1 1) | 17.260A | 2 |
| Ba 2               | 0.7083  | -0.3135 | 1.1693 | ( 0-1 1) | 18.046A | 2 |
| Common face with   |         |         |        |          | R(A-A)  |   |
| Ba 1               | 0.5578  | 0.7403  | 1.0696 | ( 0 0 1) | 4.215A  | 3 |
| Ba 8               | 0.6387  | 0.7258  | 0.8431 | ( 0 0 0) | 4.350A  | 3 |

-----  
Structural group analysis  
-----

-----  
Structural group No 1  
-----

Structure consists of 3D framework with Ba9O67N17C177H108

There are 2 interpenetrating nets  
FISE: Full interpenetration symmetry elements

1: -1

-----  
PIC: [1,0,0][0,1,0][0,0,1] (PICVR=1)

Zt=1; Zn=2

Class IIa Z=2

-----  
Coordination sequences  
-----

| Ba1: | 1  | 2   | 3   | 4   | 5    | 6    | 7    | 8    | 9    | 10    |
|------|----|-----|-----|-----|------|------|------|------|------|-------|
| Num  | 26 | 107 | 242 | 479 | 689  | 990  | 1344 | 1922 | 2240 | 2763  |
| Cum  | 27 | 134 | 376 | 855 | 1544 | 2534 | 3878 | 5800 | 8040 | 10803 |

| Ba2: | 1  | 2   | 3   | 4   | 5    | 6    | 7    | 8    | 9    | 10    |
|------|----|-----|-----|-----|------|------|------|------|------|-------|
| Num  | 26 | 106 | 243 | 479 | 689  | 989  | 1345 | 1922 | 2240 | 2762  |
| Cum  | 27 | 133 | 376 | 855 | 1544 | 2533 | 3878 | 5800 | 8040 | 10802 |

| Ba3: | 1  | 2   | 3   | 4   | 5    | 6    | 7    | 8    | 9    | 10    |
|------|----|-----|-----|-----|------|------|------|------|------|-------|
| Num  | 21 | 98  | 241 | 423 | 696  | 965  | 1377 | 1735 | 2297 | 2722  |
| Cum  | 22 | 120 | 361 | 784 | 1480 | 2445 | 3822 | 5557 | 7854 | 10576 |

| Ba4: | 1  | 2   | 3   | 4   | 5    | 6    | 7    | 8    | 9    | 10    |
|------|----|-----|-----|-----|------|------|------|------|------|-------|
| Num  | 26 | 109 | 260 | 438 | 711  | 991  | 1420 | 1764 | 2322 | 2763  |
| Cum  | 27 | 136 | 396 | 834 | 1545 | 2536 | 3956 | 5720 | 8042 | 10805 |

| Ba5: | 1  | 2   | 3   | 4   | 5    | 6    | 7    | 8    | 9    | 10    |
|------|----|-----|-----|-----|------|------|------|------|------|-------|
| Num  | 27 | 121 | 248 | 440 | 684  | 1081 | 1354 | 1768 | 2231 | 3007  |
| Cum  | 28 | 149 | 397 | 837 | 1521 | 2602 | 3956 | 5724 | 7955 | 10962 |

| Ba6: | 1  | 2   | 3   | 4   | 5    | 6    | 7    | 8    | 9    | 10    |
|------|----|-----|-----|-----|------|------|------|------|------|-------|
| Num  | 23 | 115 | 247 | 435 | 685  | 1072 | 1356 | 1763 | 2232 | 2995  |
| Cum  | 24 | 139 | 386 | 821 | 1506 | 2578 | 3934 | 5697 | 7929 | 10924 |

| Ba7: | 1  | 2   | 3   | 4   | 5    | 6    | 7    | 8    | 9    | 10    |
|------|----|-----|-----|-----|------|------|------|------|------|-------|
| Num  | 26 | 107 | 242 | 479 | 689  | 990  | 1344 | 1922 | 2240 | 2763  |
| Cum  | 27 | 134 | 376 | 855 | 1544 | 2534 | 3878 | 5800 | 8040 | 10803 |
